# Supplementary material for: Global Annual Mean Atmospheric Histories, Growth Rates and Seawater Solubility Estimations of the Halogenated Compounds HCFC-22, HCFC-141b, HCFC-142b, HFC-134a, HFC-125, HFC-23, PFC-14 and PFC-116
Source: Copernicus journal article supplement (doi:10.5194/os-2018-89), 2018-08-03
Supplement: Supplementary file 1 [file Supplement.pdf › Supplement.pdf]

# Global Annual Mean Atmospheric Histories, Growth Rates and Seawater Solubility Estimations of the Halogenated Compounds HCFC-22, HCFC-141b, HCFC-142b, HFC-134a, HFC-125, HFC-23, PFC-14 and PFC-116

Pingyang Li <sup>1</sup>, Jens Mühle <sup>2</sup>, Stephen A. Montzka <sup>3</sup>, David E. Oram <sup>4,5</sup>, Benjamin R. Miller <sup>3</sup> and Toste Tanhua <sup>1</sup>

<sup>1</sup>GEOMAR Helmholtz Centre for Ocean Research Kiel, Kiel, Germany

<sup>2</sup>Scripps Institution of Oceanography, University of California, La Jolla, San Diego, California, USA

<sup>3</sup>Earth System Research Laboratory, National Oceanic and Atmospheric Administration, Boulder, Colorado 80305, United States

<sup>4</sup>National Centre for Atmospheric Science, School of Environmental Sciences, University of East Anglia, Norwich, NR4 7TJ, UK

<sup>5</sup>Centre for Ocean and Atmospheric Sciences, School of Environmental Sciences, University of East Anglia, Norwich, NR4 7TJ, UK

Correspondence to: Pingyang Li (pli@geomar.de)

## Section S1: Smoothing spline method

We collected data from in situ, flask, archived air, firm air measurements. Database containing replicate times have been converted into a value without such replicates by using the mean of values at each replicate time. The error of the means will be the root-mean-square (RMS) of standard deviation values of replicate values. Then the data is sorted as  $x_1 < x_2 < \dots < x_i < \dots < x_n$ .

Set  $x_i, y_i, \delta y_i$  ( $i = 1, 2, \dots, n$ ) to be the decimal time, the corresponding atmospheric mole fractions and the standard deviation.

Normalize the  $x$  vector

$$t_i = (x_i - \min(x_i)) / (\max(x_i) - \min(x_i)) \quad (1)$$

The smoothing function  $f(t)$  to be constructed shall

$$\text{Minimize } p \sum_{i=0}^n \left[ \frac{g(t_i) - y_i}{\delta y_i} \right]^2 + \int g''(t)^2 dt \quad (2)$$

The solution of the minimum principle is a cubic spline. By introducing the auxiliary variable  $z$  together with the Lagrangian parameter  $p$ , we have to look for the minimum of the functional

$$\int_{t_1}^{t_n} g''(t)^2 dt + p \left[ \sum_{i=0}^n \left( \frac{g(t_i) - y_i}{\delta y_i} \right)^2 + z^2 \right] \quad (3)$$

From the corresponding Euler-Lagrange equations, we determine the optimal function  $f(t)$ .

$$f(t) = a_i + b_i(t - t_i) + c_i(t - t_i)^2 + d_i(t - t_i)^3, \quad t_i \leq t < t_{i+1} \quad (4)$$

We obtain the spline coefficients (Reinsch, 1967).

$$c_i = \frac{p Q^T y}{B}, c = [0; c_i; 0]^T \quad (5)$$

$$a = y - W^2 Q c / p \quad (6)$$

$$d_i = (c_{i+1} - c_i)/(3h_i) \quad (7)$$

$$b_i = (a_{i+1} - a_i)/h_i - c_i h_i - d_i h_i^2 \quad (8)$$

$$coeffs = [d, c, b, a] \quad (9)$$

Here, the following notation is used:

$$h_i = t_{i+1} - t_i, \quad (10)$$

$$W = diag(\delta y_1, \dots, \delta y_n), \quad (11)$$

T is the  $(n-1) \times (n-1)$  dimensional positive tridiagonal matrix with entries  $t_{ij}$  ( $i, j = 1, 2, \dots, n-1$ ) given by

$$t_{ii} = 2(h_{i-1} + h_i)/3, \quad t_{i,i+1} = t_{i+1,i} = h_i/3 \quad (12)$$

Q is the  $(n) \times (n-2)$  dimensional tridiagonal matrix with with entries  $q_{ij}$  ( $i = 1, 2, \dots, n; j = 1, 2, \dots, n-2$ ) given by

$$q_{i-1,i} = 1/h_{i-1}, \quad q_{i,i} = -1/h_{i-1} - 1/h_i, \quad q_{i+1,i} = 1/h_i \quad (13)$$

The elements in the  $i^{\text{th}}$  column of  $Q$  given by the coefficients of the  $2^{\text{th}}$  order divided differences based on  $t_i, \dots, t_{i+2}$ . Let the coefficient matrix be denoted by

$$B_p = Q^T W^2 Q + pT \quad (14)$$

The *influence matrix* associated with the smoothing spline is the unique  $n \times n$  symmetric matrix  $A_p$  satisfying

$$a = A_p y \quad (15)$$

The error

$$error = y - a = W^2 Q B_p^{-1} Q^T y \quad (16)$$

So that

$$I - A_p = W^2 Q B_p^{-1} Q^T \quad (17)$$

The weighted residual sum of squares

$$RSS = \|(I - A_p)y/W\|^2 = \|W^2 Q B_p^{-1} Q^T y\|^2 \quad (18)$$

The estimate value of the generalized cross-validation (GCV) minimization function  $V$  of  $p$  used in the experiments below is the minimizer of the GCV function  $V_p$  defined

$$V_p = \frac{n \|(I - A_p)y/W\|^2}{[Tr(I - A_p)]^2} \quad (19)$$

The estimated degrees of freedom (Hutchinson and De Hoog, 1985)

$$Tr(I - A_p) = n - 2 - pTr(T/B) \quad (20)$$

The estimated variance

$$VAR = RSS/Tr(I - A_p) \quad (21)$$

The estimated 95 % Bayesian confidence intervals (CI) for the Cross-validated Smoothing Spline (Wahba, 1983) are given by

$$CI = 1.96 \sqrt{VAR * diag(A_p)} \quad (22)$$

**Table S2.** Comparison among the calculated Ostwald solubility coefficients ( $L_0$ , L L<sup>-1</sup>) by the poly-parameter linear free energy relationships (pp-LFERs), observed ones and calculated ones by the Clark-Glew-Weiss (CGW) fit of target compounds and CFC-12 in water at 298.15 K and 310.15 K

| Species   | Chemical Formula                                | T (K)  | Calculated log $L_0$ by pp-LFERs <sup>a</sup> | Calculated $L_0$ by pp-LFERs <sup>a</sup> | Calculated log $L_{0\_cV}$ by pp-LFERs <sup>b</sup> | Calculated $L_{0\_cV}$ by pp-LFERs <sup>b</sup> | Observed log $L_0$ <sup>c</sup> | Observed $L_0$ <sup>c</sup> | Calculated $L_0$ by the CGW fit <sup>d</sup> | RSD <sup>e</sup> (%) | RSD $_{cV}$ <sup>f</sup> (%) |
|-----------|-------------------------------------------------|--------|-----------------------------------------------|-------------------------------------------|-----------------------------------------------------|-------------------------------------------------|---------------------------------|-----------------------------|----------------------------------------------|----------------------|------------------------------|
| HCFC-22   | CHClF <sub>2</sub>                              | 298.15 | -0.017                                        | 0.961                                     | -0.052                                              | 0.888                                           | -0.091                          | 0.811                       | 0.844                                        | 9.18                 | 3.53                         |
| HCFC-141b | C <sub>2</sub> H <sub>3</sub> Cl <sub>2</sub> F | 298.15 | -0.136                                        | 0.731                                     | -0.154                                              | 0.702                                           | -0.148                          | 0.711                       | 0.711                                        | 1.97                 | 0.92                         |
| HCFC-142b | C <sub>2</sub> H <sub>3</sub> ClF <sub>2</sub>  | 298.15 | -0.405                                        | 0.394                                     | -0.440                                              | 0.363                                           | -0.449                          | 0.356                       | 0.352                                        | 7.97                 | 2.33                         |
| HFC-134a  | CH <sub>2</sub> FCF <sub>3</sub>                | 298.15 | -0.326                                        | 0.472                                     | -0.407                                              | 0.392                                           | -0.408                          | 0.391                       | 0.381                                        | 15.10                | 2.02                         |
| HFC-125   | C <sub>2</sub> HF <sub>5</sub>                  | 298.15 | -1.003                                        | 0.099                                     | -1.130                                              | 0.074                                           | -1.059                          | 0.087                       | 0.086                                        | 9.79                 | 10.78                        |
| HFC-23    | CHF <sub>3</sub>                                | 298.15 | -0.453                                        | 0.352                                     | -0.505                                              | 0.313                                           | -0.510                          | 0.309                       | 0.313                                        | 8.31                 | 0.14                         |
| PFC-14    | CF <sub>4</sub>                                 | 298.15 | -2.241                                        | 0.00574                                   | -2.296                                              | 0.00505                                         | -2.306                          | 0.00494                     | 0.00513                                      | 7.98                 | 1.04                         |
| PFC-116   | C <sub>2</sub> F <sub>6</sub>                   | 298.15 | -2.658                                        | 0.00220                                   | -2.763                                              | 0.00173                                         | -                               | -                           | 0.00143                                      | 29.80                | 13.24                        |
| CFC-12    | CCl <sub>2</sub> F <sub>2</sub>                 | 298.15 | -1.120                                        | 0.076                                     | -1.155                                              | 0.070                                           | -1.129                          | 0.074                       | 0.069                                        | 6.61                 | 0.94                         |
| HCFC-22   | CHClF <sub>2</sub>                              | 310.15 | -0.161                                        | 0.691                                     | -0.203                                              | 0.626                                           | -                               | -                           | 0.598                                        | 10.23                | 3.27                         |
| HCFC-141b | C <sub>2</sub> H <sub>3</sub> Cl <sub>2</sub> F | 310.15 | -0.306                                        | 0.494                                     | -0.327                                              | 0.471                                           | -0.336                          | 0.461                       | 0.484                                        | 1.43                 | 2.06                         |
| HCFC-142b | C <sub>2</sub> H <sub>3</sub> ClF <sub>2</sub>  | 310.15 | -0.571                                        | 0.269                                     | -0.614                                              | 0.243                                           | -0.605                          | 0.248                       | 0.246                                        | 6.14                 | 0.80                         |
| HFC-134a  | CH <sub>2</sub> FCF <sub>3</sub>                | 310.15 | -0.563                                        | 0.274                                     | -0.621                                              | 0.239                                           | -0.547                          | 0.284                       | 0.269                                        | 1.10                 | 8.30                         |
| HFC-125   | C <sub>2</sub> HF <sub>5</sub>                  | 310.15 | -1.208                                        | 0.062                                     | -1.339                                              | 0.046                                           | -1.203                          | 0.063                       | 0.062                                        | 0.10                 | 21.10                        |
| HFC-23    | CHF <sub>3</sub>                                | 310.15 | -0.618                                        | 0.241                                     | -0.683                                              | 0.208                                           | -0.622                          | 0.239                       | 0.225                                        | 4.87                 | 5.62                         |
| PFC-14    | CF <sub>4</sub>                                 | 310.15 | -2.310                                        | 0.00490                                   | -2.382                                              | 0.00415                                         | -2.386                          | 0.00411                     | 0.00437                                      | 8.12                 | 3.60                         |
| PFC-116   | C <sub>2</sub> F <sub>6</sub>                   | 310.15 | -2.755                                        | 0.00176                                   | -2.883                                              | 0.00131                                         | -                               | -                           | 0.00110                                      | 32.53                | 12.15                        |
| CFC-12    | CCl <sub>2</sub> F <sub>2</sub>                 | 310.15 | -1.213                                        | 0.061                                     | -1.256                                              | 0.055                                           | -1.275                          | 0.053                       | 0.048                                        | 17.00                | 10.00                        |

<sup>a</sup> Calculated log  $L_0$  and  $L_0$  are calculated by the pp-LFERs, which are obtained from Table 6,7,9,12-15 in Abraham et al. (2001) and Table 2 in Abraham et al. (2012)

<sup>b</sup> Calculated log  $L_{0\_cV}$  and  $L_{0\_cV}$  are calculated by the pp-LFERs based on the corrected  $V$

<sup>c</sup> Observed log  $L_0$  and  $L_0$  are measured by experiments, which are also obtained from Table 6,7,9,12-15 in Abraham et al. (2001) and Table 2 in Abraham et al. (2012)

<sup>d</sup> Calculated  $L_0$  by the CGW fit are calculated based on the Combined Method for water solubility

<sup>e</sup> Relative standard deviation (RSD) of calculated  $L_0$  by the pp-LFERs and calculated  $L_0$  by the CGW fit

<sup>f</sup> Relative standard deviation (RSD) of calculated  $L_{0\_cV}$  by the pp-LFERs and calculated  $L_0$  by the CGW fit



**Table S4.** Ostwald solubility function of target compounds and CFC-12 in water estimated by Method II at 298.15 K and 310.15 K

| Species   | Chemical Formula                                | $T$ (K) | $c$    | $e$   | $s$   | $a$   | $b$   | $v$    | $K_S$         | $L_0$ at 1 atm, 25 °C (L L <sup>-1</sup> ) | $L$ at 1 atm, 25 °C, 35.0 ‰ (L L <sup>-1</sup> ) |
|-----------|-------------------------------------------------|---------|--------|-------|-------|-------|-------|--------|---------------|--------------------------------------------|--------------------------------------------------|
| HCFC-22   | CHClF <sub>2</sub>                              | 298.15  | -0.994 | 0.577 | 2.549 | 3.813 | 4.841 | -0.869 | 0.169 ± 0.037 | 0.888                                      | 0.703                                            |
| HCFC-141b | C <sub>2</sub> H <sub>3</sub> Cl <sub>2</sub> F | 298.15  | -0.994 | 0.577 | 2.549 | 3.813 | 4.841 | -0.869 | 0.204 ± 0.043 | 0.702                                      | 0.530                                            |
| HCFC-142b | C <sub>2</sub> H <sub>3</sub> ClF <sub>2</sub>  | 298.15  | -0.994 | 0.577 | 2.549 | 3.813 | 4.841 | -0.869 | 0.198 ± 0.037 | 0.363                                      | 0.277                                            |
| HFC-134a  | CH <sub>2</sub> FCF <sub>3</sub>                | 298.15  | -0.994 | 0.577 | 2.549 | 3.813 | 4.841 | -0.869 | 0.193 ± 0.034 | 0.392                                      | 0.300                                            |
| HFC-125   | C <sub>2</sub> HF <sub>5</sub>                  | 298.15  | -0.994 | 0.577 | 2.549 | 3.813 | 4.841 | -0.869 | 0.224 ± 0.028 | 0.091                                      | 0.067                                            |
| HFC-23    | CHF <sub>3</sub>                                | 298.15  | -0.994 | 0.577 | 2.549 | 3.813 | 4.841 | -0.869 | 0.168 ± 0.028 | 0.313                                      | 0.248                                            |
| PFC-14    | CF <sub>4</sub>                                 | 298.15  | -0.994 | 0.577 | 2.549 | 3.813 | 4.841 | -0.869 | 0.202 ± 0.016 | 0.00505                                    | 0.00382                                          |
| PFC-116   | C <sub>2</sub> F <sub>6</sub>                   | 298.15  | -0.994 | 0.577 | 2.549 | 3.813 | 4.841 | -0.869 | 0.244 ± 0.017 | 0.00173                                    | 0.00123                                          |
| CFC-12    | CCl <sub>2</sub> F <sub>2</sub>                 | 298.15  | -0.994 | 0.577 | 2.549 | 3.813 | 4.841 | -0.869 | 0.204 ± 0.034 | 0.070                                      | 0.053                                            |
| HCFC-22   | CHClF <sub>2</sub>                              | 310.15  | -0.966 | 0.698 | 2.412 | 3.393 | 4.577 | -1.072 | 0.169 ± 0.037 | 0.626                                      | 0.530                                            |
| HCFC-141b | C <sub>2</sub> H <sub>3</sub> Cl <sub>2</sub> F | 310.15  | -0.966 | 0.698 | 2.412 | 3.393 | 4.577 | -1.072 | 0.204 ± 0.043 | 0.471                                      | 0.385                                            |
| HCFC-142b | C <sub>2</sub> H <sub>3</sub> ClF <sub>2</sub>  | 310.15  | -0.966 | 0.698 | 2.412 | 3.393 | 4.577 | -1.072 | 0.198 ± 0.037 | 0.243                                      | 0.200                                            |
| HFC-134a  | CH <sub>2</sub> FCF <sub>3</sub>                | 310.15  | -0.966 | 0.698 | 2.412 | 3.393 | 4.577 | -1.072 | 0.193 ± 0.034 | 0.239                                      | 0.198                                            |
| HFC-125   | C <sub>2</sub> HF <sub>5</sub>                  | 310.15  | -0.966 | 0.698 | 2.412 | 3.393 | 4.577 | -1.072 | 0.224 ± 0.028 | 0.059                                      | 0.047                                            |
| HFC-23    | CHF <sub>3</sub>                                | 310.15  | -0.966 | 0.698 | 2.412 | 3.393 | 4.577 | -1.072 | 0.168 ± 0.028 | 0.208                                      | 0.176                                            |
| PFC-14    | CF <sub>4</sub>                                 | 310.15  | -0.966 | 0.698 | 2.412 | 3.393 | 4.577 | -1.072 | 0.202 ± 0.016 | 0.00415                                    | 0.00340                                          |
| PFC-116   | C <sub>2</sub> F <sub>6</sub>                   | 310.15  | -0.966 | 0.698 | 2.412 | 3.393 | 4.577 | -1.072 | 0.244 ± 0.017 | 0.00131                                    | 0.00103                                          |
| CFC-12    | CCl <sub>2</sub> F <sub>2</sub>                 | 310.15  | -0.966 | 0.698 | 2.412 | 3.393 | 4.577 | -1.072 | 0.204 ± 0.034 | 0.055                                      | 0.045                                            |

$$L = 10^{\wedge} \left[ -K_S \cdot \frac{S}{M_{NaCl}} + c + eE + sS + aA + bB + vV \right], \text{ (} V \text{ for HFC-125, corrected } V \text{ for other compounds)}$$

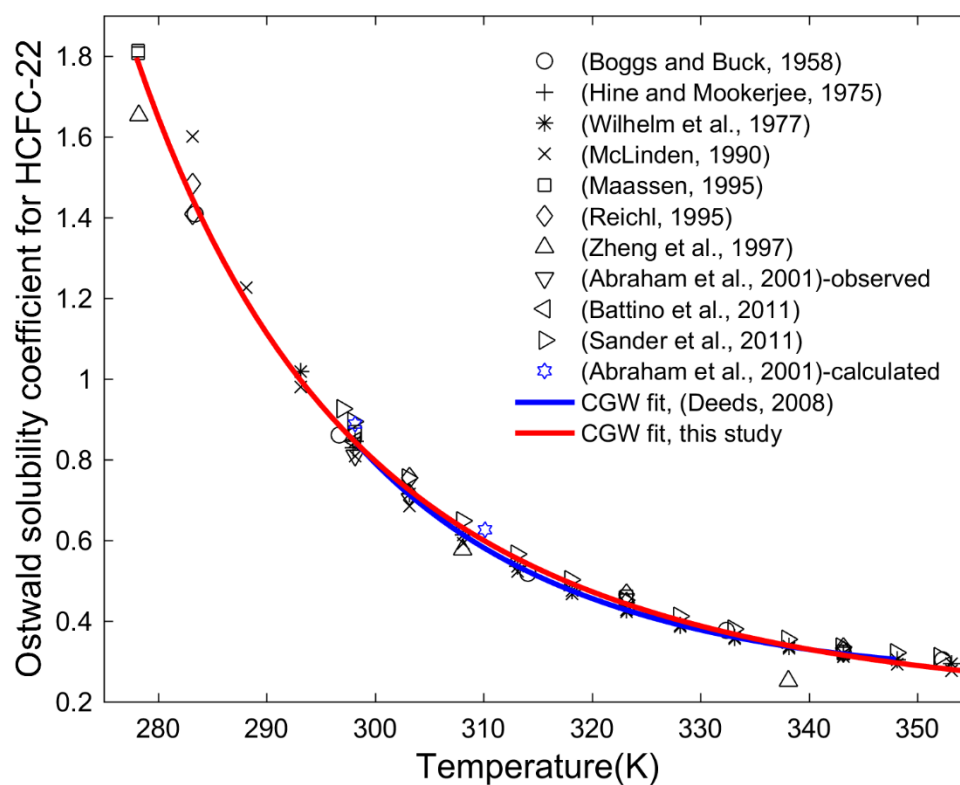

**Figure S1.** The freshwater solubility (Ostwald solubility coefficients) for HCFC-22 as a function of temperature by collecting data from previous studies (Boggs and Buck Jr, 1958; Hine and Mookerjee, 1975; Wilhelm et al., 1977; McLinden, 1990; Maßen, 1995; Reichl, 1995; Zheng et al., 1997; Abraham et al., 2001; Battino et al., 2011; Sander et al., 2011). The Clarke-Glew-Weiss (CGW) is used to fit the data (black markers) and compared with the results from Deeds (2008) and from (Abraham et al., 2001)-calculated (Hexagram, calculated by Revised Method II). The CGW fit in this study agrees to within 4.0 % with two-thirds of the data.

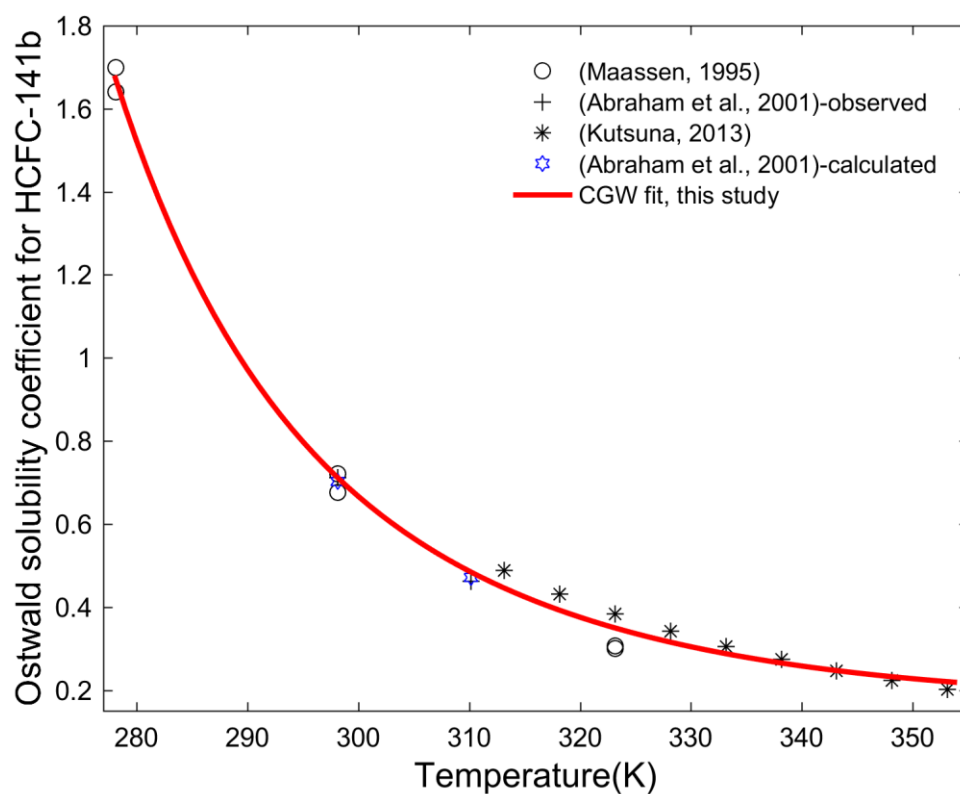

**Figure S2.** The freshwater solubility (Ostwald solubility coefficients) for HCFC-141b as a function of temperature by collecting data from previous studies (Maassen, 1995; Abraham et al., 2001; Kutsuna, 2013). The Clarke-Glew-Weiss (CGW) is used to fit the data (black markers) and compared with the results from (Abraham et al., 2001)-calculated (Hexagram, calculated by Revised Method II). The CGW fit in this study agrees to within 7.8 % with two-thirds of the data.

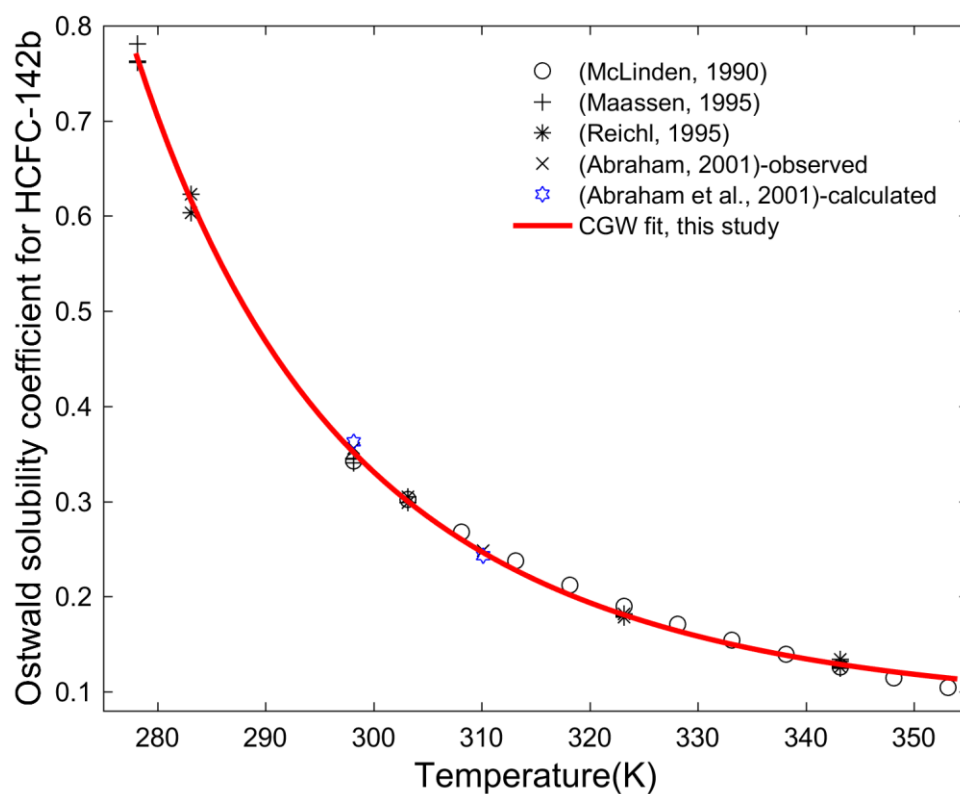

**Figure S3.** The freshwater solubility (Ostwald solubility coefficients) for HCFC-142b as a function of temperature by collecting data from previous studies (McLinden, 1990; Maassen, 1995; Reichl, 1995; Abraham et al., 2001). The Clarke-Glew-Weiss (CGW) is used to fit the data (black markers) and compared with the results from (Abraham et al., 2001)-calculated (Hexagram, calculated by Revised Method II). The CGW fit in this study agrees to within 2.5 % with two-thirds of the data.



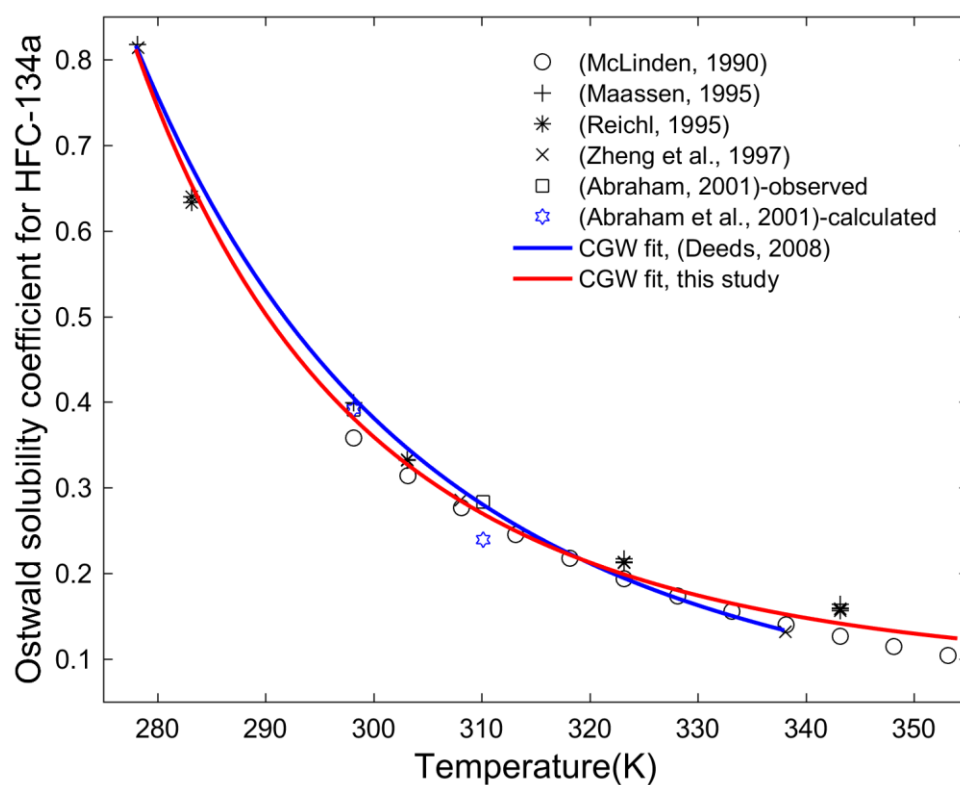

**Figure S4.** The freshwater solubility (Ostwald solubility coefficients) for HFC-134a as a function of temperature by collecting data from previous studies (McLinden, 1990; Maaßen, 1995; Reichl, 1995; Zheng et al., 1997; Abraham et al., 2001). The Clarke-Glew-Weiss (CGW) is used to fit the data (black markers) and compared with the results from Deeds (2008) and from (Abraham et al., 2001)-calculated (Hexagram, calculated by Revised Method II). The CGW fit in this study agrees to within 6.8 % with two-thirds of the data.

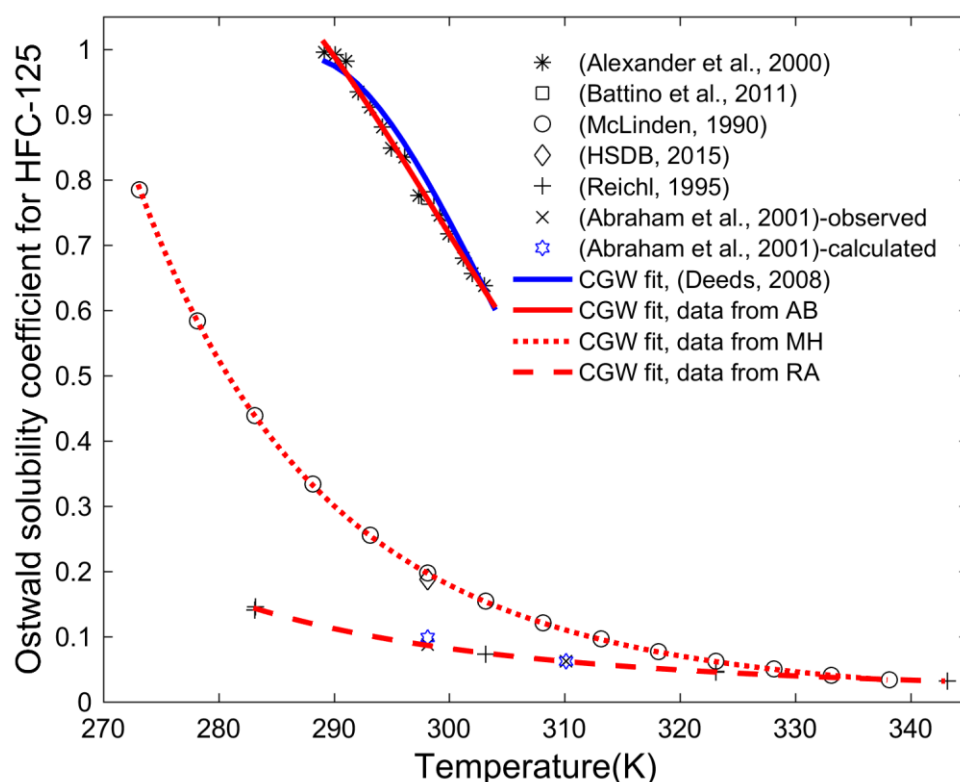

**Figure S5.** The freshwater solubility (Ostwald solubility coefficients) for HFC-125 as a function of temperature by collecting data from previous studies (Alexandre et al., 2000; Battino et al., 2011; McLinden, 1990; HSDB, 2015; Reichl, 1995; Abraham et al., 2001). The Clarke-Glew-Weiss (CGW) is used to fit the data (black markers) and compared with the results from Deeds (2008) and from (Abraham et al., 2001)-calculated (Hexagram, calculated by Method II). The CGW fit in this study agrees to within 2.1 % with all data. There are three CGW fit curves from these literatures. Curve 1 is the upper and red solid line fitted the data (Alexandre et al., 2000; Battino et al., 2011) in the temperature range of 289.15 K ~ 303.15 K. This fit agrees to within 1.0 % with 2/3 data. Curve 2 is the middle and red dotted line fitted the data (McLinden, 1990; HSDB, 2015) from 273.15 K to 338.15 K. This fit agrees to within 0.75 % with 2/3 data. Curve 3 is the bottom and red dashed line fitted the data (Reichl, 1995; Abraham et al., 2001) in the temperature range of 283.15 K ~ 343.15 K. This fit agrees to within 3.3 % with two-thirds of the data.

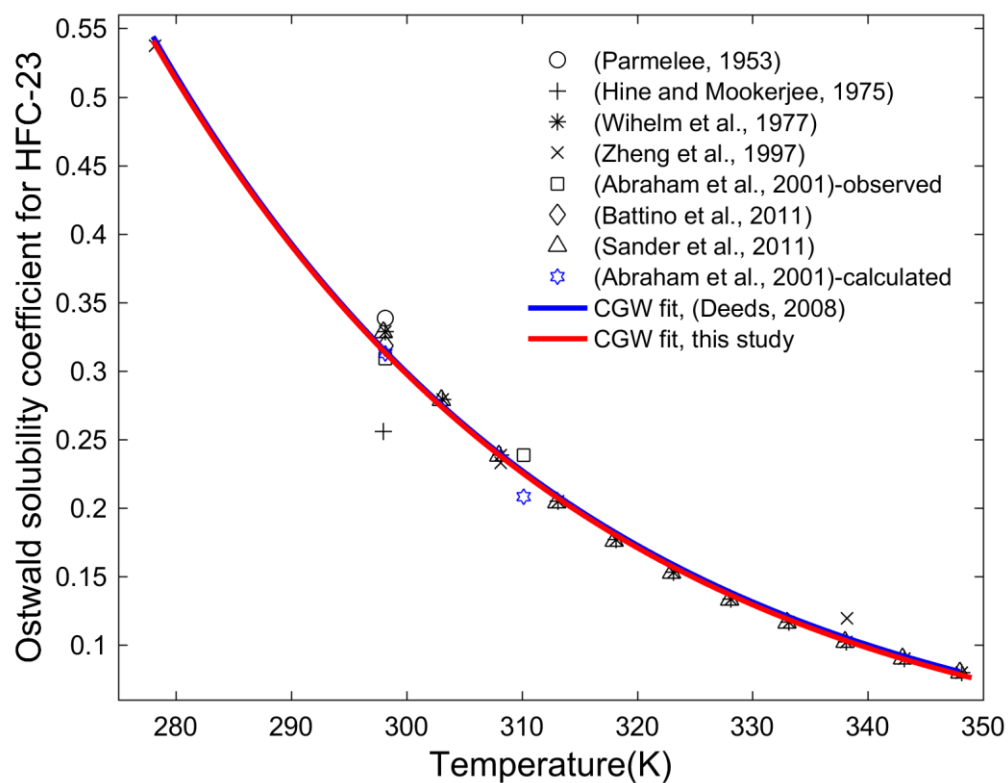

**Figure S6.** The freshwater solubility (Ostwald solubility coefficients) for HFC-23 as a function of temperature by collecting data from previous studies (Parmelee, 1953; Hine and Mookerjee, 1975; Wilhelm et al., 1977; Zheng et al., 1997; Abraham et al., 2001; Battino et al., 2011; Sander et al., 2011). The Clarke-Glew-Weiss (CGW) is used to fit the data (black markers) and compared with the results from Deeds (2008) and from (Abraham et al., 2001)-calculated (Hexagram, calculated by Revised Method II). The CGW fit in this study agrees to within 2.3 % with two-thirds of the data.

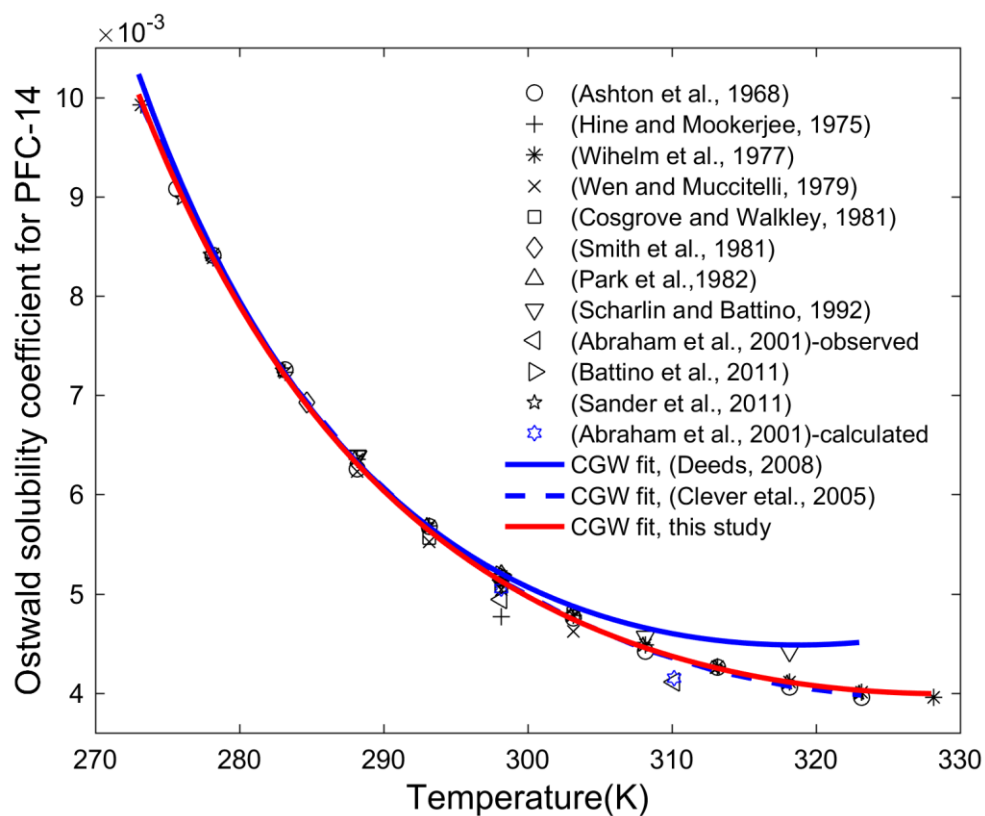

**Figure S7.** The freshwater solubility (Ostwald solubility coefficients) for PFC-14 as a function of temperature by collecting data from previous studies (Smith et al., 1981; Park et al., 1982; Scharlin and Battino, 1992; Abraham et al., 2001; Battino et al., 2011; Sander et al., 2011). The Clarke-Glew-Weiss (CGW) is used to fit the data (black markers) and compared with the results from Deeds (2008), from Clever et al. (2005) and from (Abraham et al., 2001)-calculated (Hexagram, calculated by Revised Method II). The CGW fit in this study agrees to within 0.95 % with two-thirds of the data.

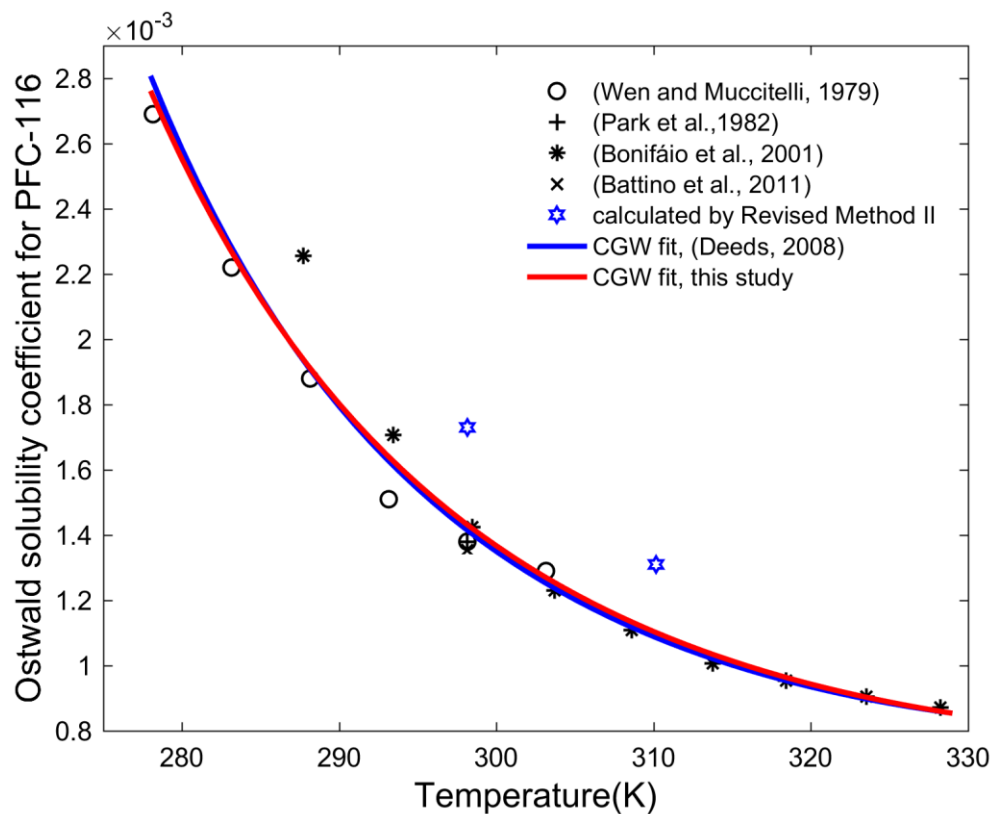

**Figure S8.** The freshwater solubility (Ostwald solubility coefficients) for PFC-116 as a function of temperature by collecting data from previous studies (Wen and Muccitelli, 1979; Park et al., 1982; Bonifácio et al., 2001; Battino et al., 2011). The Clarke-Glew-Weiss (CGW) is used to fit the data (black markers) and compared with the fit results from Deeds (2008) and from the data calculated by Revised Method II (Hexagram). The CGW fit in this study agrees to within 3.5 % with two-thirds of the data.

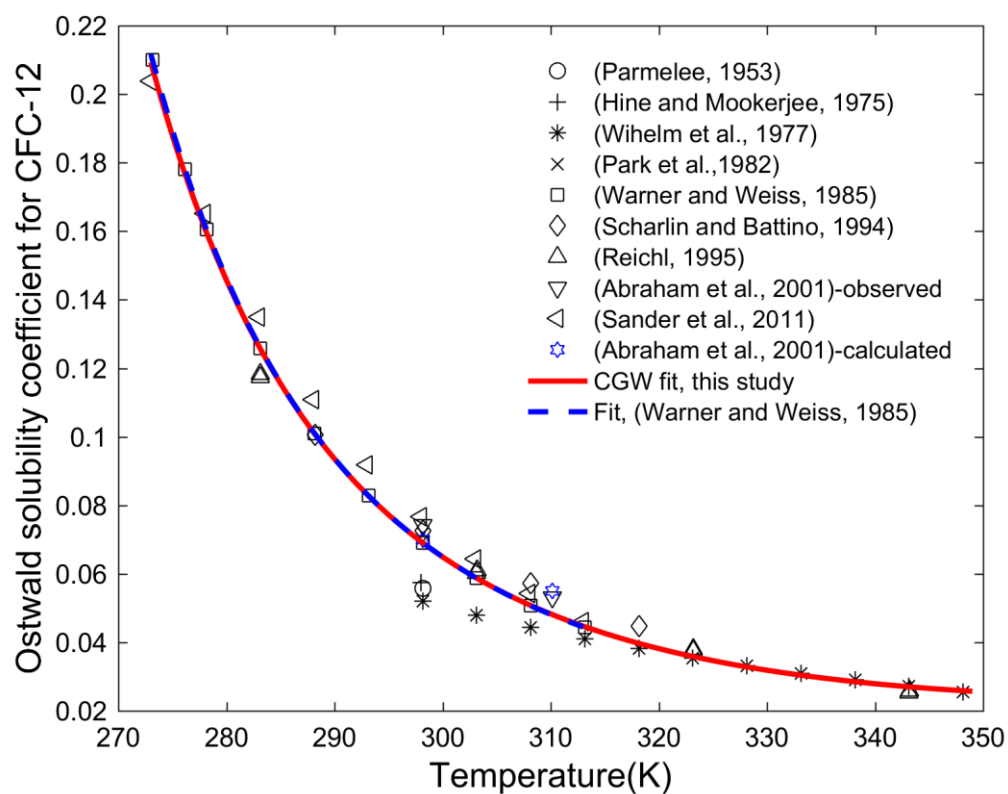

**Figure S9.** The freshwater solubility (Ostwald solubility coefficients) for CFC-12 as a function of temperature by collecting data from previous studies (Parmelee, 1953; Hine and Mookerjee, 1975; Wilhelm et al., 1977; Park et al., 1982; Warner and Weiss, 1985; Scharlin and Battino, 1994; Reichl, 1995; Abraham et al., 2001; Sander et al., 2011). The Clarke-Glew-Weiss (CGW) is used to fit the data (black markers) and compared with the fit results from Warner and Weiss (1985) and the data from (Abraham et al., 2001)-calculated (Hexagram, calculated by Revised Method II). The CGW fit in this study agrees to within 6.6 % with two-thirds of the data.

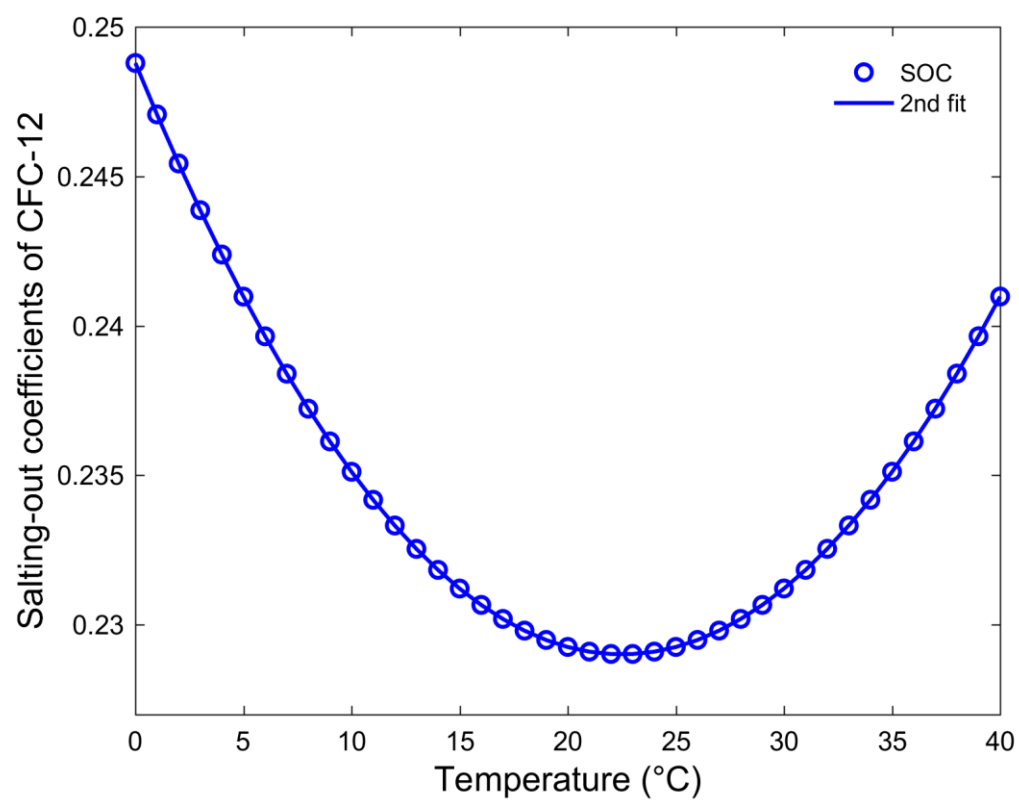

**Figure S10.** The relationship between salting-out coefficients (SOC) and temperature for CFC-12 calculated by the Combined Method based on the data from Warner and Weiss (1985).

## References

- Abraham, M. H., Gola, J. M., Cometto-Muñiz, J. E., and Cain, W. S.: Solvation properties of refrigerants, and the estimation of their water-solvent and gas-solvent partitions, *Fluid Phase Equilib.*, 180, 41-58, doi:10.1016/S0378-3812(00)00511-2, 2001.
- Abraham, M. H., Gil-Lostes, J., Corr, S., and Acree, W. E.: Determination of partition coefficients of refrigerants by gas liquid chromatographic headspace analysis, *J. Chromatogr. A*, 1265, 144-148, doi:10.1016/j.chroma.2012.09.085, 2012.
- Alexandre, A. F. M., Abel, G. M. F., and Isabel, M. A. I.: Solubilities of some new refrigerants in water, *Fluid Phase Equilib.*, 173, 97-107, doi:10.1016/s0378-3812(00)00390-3, 2000.
- Battino, R., Seybold, P. G., and Campanell, F. C.: Correlations Involving the Solubility of Gases in Water at 298.15 K and 101325 Pa, *Journal of Chemical & Engineering Data*, 56, 727-732, doi:10.1021/jc101070h, 2011.
- Boggs, J. E., and Buck Jr, A. E.: The solubility of some chloromethanes in water, *J. Phys. Chem.*, 62, 1459-1461, doi:10.1021/j150569a031, 1958.
- Bonifácio, R. P., Pádua, A. A. H., and Costa Gomes, M. F.: Perfluoroalkanes in water: Experimental Henry's law coefficients for hexafluoroethane and computer simulations for tetrafluoromethane and hexafluoroethane, *J. Phys. Chem. B*, 105, 8403-8409, doi:10.1021/jp010597k, 2001.
- Clever, H. L., Battino, R., Clever, H. L., Jaselskis, B., Clever, H. L., Yampol'skii, Y. P., Jaselskis, B., Scharlin, P., and Young, C. L.: IUPAC-NIST Solubility Data Series. 80. Gaseous Fluorides of Boron, Nitrogen, Sulfur, Carbon, and Silicon and Solid Xenon Fluorides in all Solvents, *J. Phys. Chem. Ref. Data*, 34, 201-438, doi:10.1063/1.1794762, 2005.
- Deeds, D. A.: The Natural Geochemistry of Tetrafluoromethane and Sulfur Hexafluoride : Studies of Ancient Mojave Desert Groundwaters, North Pacific Seawaters and the Summit Emissions of Kilauea Volcano, PhD thesis, 2008.
- Hine, J., and Mookerjee, P. K.: Structural effects on rates and equilibriums. XIX. Intrinsic hydrophilic character of organic compounds. Correlations in terms of structural contributions, *J. Org. Chem.*, 40, 292-298, doi:10.1021/jo00891a006, 1975.
- HSDB: Hazardous Substances Data Bank, TOXicology data NETwork (TOXNET), National Library of Medicine (US), availableat: <http://toxnet.nlm.nih.gov/newtoxnet/hsdb.htm> (last access: 10 April 2015), 2015.
- Hutchinson, M. F., and De Hoog, F.: Smoothing noisy data with spline functions, *Numer. Math.*, 47, 99-106, doi:10.1007/BF01404567, 1985.
- Kutsuna, S.: Determination of Rate Constants for Aqueous Reactions of HCFC-123 and HCFC-225ca with OH- Along with Henry's Law Constants of Several HCFCs, *Int. J. Chem. Kinet.*, 45, 440-451, doi:10.1002/kin.20780, 2013.
- Maaßen, S.: Experimentelle Bestimmung und Korrelierung von Verteilungskoeffizienten in verdünnten Lösungen, Shaker, 1995.
- Melinden, M. O.: Physical properties of alternatives to the fully halogenated chlorofluorocarbons, Scientific assessment of stratospheric ozone, 2, 1990.
- Park, T., Rettich, T. R., Battino, R., Peterson, D., and Wilhelm, E.: Solubility of gases in liquids. 14. Bunsen coefficients for several fluorine-containing gases (Freons) dissolved in water at 298.15 K, *J. Chem. Eng. Data*, 27, 324-326, doi:10.1021/jc00029a027, 1982.



- Parmelee, H. M.: Water solubility of Freon refrigerants, *Refrigerating Engineering*, 61, 1341, 1953.
- Reichl, A.: Messung und Korrelierung von Gaslöslichkeiten halogener Kohlenwasserstoffe, Shaker, 1995.
- Reinsch, C. H.: Smoothing by spline functions, *Numer. Math.*, 10, 177-183, doi:10.1007/BF02162161, 1967.
- Sander, S., Abbatt, J., Barker, J., Burkholder, J., Golden, D., Kolb, C., Kurylo, M., Moortgat, G., Wine, P., Huie, R., and Orkin, V.: *Chemical Kinetics and Photochemical Data for Use in Atmospheric Studies Evaluation Number 17*, Pasadena, CA: Jet Propulsion Laboratory, National Aeronautics and Space Administration, 2011.
- Scharlin, P., and Battino, R.: Solubility of  $\text{CCl}_2\text{F}_2$ ,  $\text{CClF}_3$ ,  $\text{CF}_4$  and  $\text{c-C}_4\text{F}_8$  in  $\text{H}_2\text{O}$  and  $\text{D}_2\text{O}$  at 288 to 318 K and 101.325 kPa. Thermodynamics of transfer of gases from  $\text{H}_2\text{O}$  to  $\text{D}_2\text{O}$ , *Fluid Phase Equilib.*, 95, 137-147, doi:10.1016/0378-3812(94)80066-9, 1994.
- Wahba, G.: "Bayesian" confidence intervals" for the cross-validated smoothing spline, *Journal of the Royal Statistical Society. Series B (Methodological)*, 133-150, 1983.
- Warner, M. J., and Weiss, R. F.: Solubilities of chlorofluorocarbons 11 and 12 in water and seawater, *Deep Sea Res. Part A. Oceanogr. Res. Pap.*, 32, 13, doi:10.1016/0198-0149(85)90099-8, 1985.
- Wen, W., and Muccitelli, J. A.: Thermodynamics of Some Perfluorocarbon Gases in Water, *J. Solution Chem.*, 8, 22, doi:10.1007/BF00648882, 1979.
- Wilhelm, E., Battino, R., and Wilcock, R. J.: Low-Pressure Solubility of Gases in Liquid Water, *Chem. Rev.*, 77, 44, 1977.
- Zheng, D., Guo, T., and Knapp, H.: Experimental and modeling studies on the solubility of  $\text{CO}_2$ ,  $\text{CHClF}_2$ ,  $\text{CHF}_3$ ,  $\text{C}_2\text{H}_2\text{F}_4$  and  $\text{C}_2\text{H}_4\text{F}_2$  in water and aqueous NaCl solutions under low pressures, *Fluid Phase Equilib.*, 129, 197-209, doi:10.1016/S0378-3812(96)03177-9, 1997.
