# Supplementary material for: Global Annual Mean Atmospheric Histories, Growth Rates and Seawater Solubility Estimations of the Halogenated Compounds HCFC-22, HCFC-141b, HCFC-142b, HFC-134a, HFC-125, HFC-23, PFC-14 and PFC-116
Source: Copernicus journal article supplement (doi:10.5194/os-2018-89), 2018-08-03
Supplement: Supplementary file 1 [file TableS1.xlsx]

## Sheet: Title page
Global Annual Mean Atmospheric Histories, Growth Rates and Seawater Solubility Estimations of the Halogenated Compounds HCFC-22, HCFC-141b, HCFC-142b, HFC-134a, HFC-125, HFC-23, PFC-14 and PFC-116
Pingyang Li 1, Jens Mühle 2, Stephen A. Montzka 3, David E. Oram 4,5, Benjamin R. Miller 3 and Toste Tanhua 1
1GEOMAR Helmholtz Centre for Ocean Research Kiel, Kiel, Germany
2 Scripps Institution of Oceanography, University of California, La Jolla, San Diego, California, USA
3Earth System Research Laboratory, National Oceanic and Atmospheric Administration, Boulder, Colorado 80305, United States
4National Centre for Atmospheric Science, School of Environmental Sciences, University of East Anglia, Norwich, NR4 7TJ, UK
5Centre for Ocean and Atmospheric Sciences, School of Environmental Sciences, University of East Anglia, Norwich, NR4 7TJ, UK
Table S1. Annual means atmospheric mole fractions of HCFC-22, HCFC-141b, HCFC-142b, HFC-134a, HFC-125, HFC-23, PFC-14 and PFC-116

## Sheet: HCFC-22
HCFC-22
Mid-year						Mid-February				Mid-August
Year	NH	NH error	SH	SH error		Year	NH	NH error		Year	SH	SH error
1944.5	0	2.07049	0	1.47335		1944.13	0	2.34288		1944.62	0	1.47131
1945.5	0	1.6092	3.40471e-06	1.46214		1945.13	0	1.68796		1945.62	0	1.461
1946.5	0	1.53937	-1.4982e-05	1.45891		1946.13	0	1.54509		1946.62	0	1.45881
1947.5	0	1.53501	6.66606e-05	1.45902		1947.13	0	1.53567		1947.62	0	1.45902
1948.5	0.0014912	1.52809	-0.000296878	1.45895		1948.13	0	1.53222		1948.62	0	1.45895
1949.5	0.0156704	1.51645	0.00132867	1.45897		1949.13	0.00885183	1.5205		1949.62	0	1.45897
1950.5	0.0403625	1.50847	-0.00631609	1.45896		1950.13	0.0293417	1.51068		1950.62	0	1.45896
1951.5	0.0760752	1.5049	0.0510583	1.45896		1951.13	0.0609811	1.50569		1951.62	0.0656232	1.45896
1952.5	0.12455	1.50386	0.100971	1.45896		1952.13	0.103991	1.50403		1952.62	0.0998263	1.45896
1953.5	0.190983	1.50369	0.144239	1.45896		1953.13	0.162678	1.5037		1953.62	0.155241	1.45896
1954.5	0.284202	1.50368	0.25216	1.45896		1954.13	0.244109	1.50368		1954.62	0.264988	1.45896
1955.5	0.413903	1.50367	0.351711	1.45896		1955.13	0.359008	1.50368		1955.62	0.364689	1.45896
1956.5	0.584892	1.50365	0.446361	1.45896		1956.13	0.514188	1.50366		1956.62	0.456234	1.45896
1957.5	0.79958	1.50363	0.597774	1.45896		1957.13	0.71202	1.50364		1957.62	0.621989	1.45896
1958.5	1.06193	1.50363	0.799465	1.45896		1958.13	0.955768	1.50363		1958.62	0.82282	1.45896
1959.5	1.37578	1.50362	1.04332	1.45896		1959.13	1.24991	1.50362		1959.62	1.077	1.45896
1960.5	1.74357	1.50362	1.40007	1.45896		1960.13	1.59702	1.50362		1960.62	1.44902	1.45896
1961.5	2.17155	1.50362	1.80849	1.45896		1961.13	2.00077	1.50362		1961.62	1.86012	1.45896
1962.5	2.67415	1.50362	2.19578	1.45896		1962.13	2.47251	1.50362		1962.62	2.24017	1.45896
1963.5	3.27069	1.50362	2.69979	1.45896		1963.13	3.03063	1.50362		1963.62	2.77363	1.45896
1964.5	3.98469	1.50362	3.30296	1.45896		1964.13	3.6964	1.50362		1964.62	3.37405	1.45896
1965.5	4.8441	1.50362	3.99687	1.45896		1965.13	4.49677	1.50362		1965.62	4.09202	1.45896
1966.5	5.87933	1.50362	4.85903	1.45896		1966.13	5.46115	1.50362		1966.62	4.97007	1.45896
1967.5	7.12135	1.50362	5.80091	1.45896		1967.13	6.62109	1.50362		1967.62	5.91886	1.45896
1968.5	8.59647	1.50362	6.94201	1.45896		1968.13	8.00549	1.50362		1968.62	7.0937	1.45896
1969.5	10.3201	1.50362	8.41103	1.45896		1969.13	9.63486	1.50362		1969.62	8.60777	1.45896
1970.5	12.2947	1.50362	10.0643	1.45896		1970.13	11.5158	1.50362		1970.62	10.2697	1.45895
1971.5	14.5195	1.50362	11.9137	1.45898		1971.13	13.6467	1.50362		1971.62	12.1568	1.45899
1972.5	16.9894	1.50362	14.023	1.45888		1972.13	16.0266	1.50362		1972.62	14.2909	1.45884
1973.5	19.6926	1.50362	16.3697	1.45925		1973.13	18.6442	1.50362		1973.62	16.6714	1.45942
1974.5	22.6158	1.50362	19.0466	1.45787		1974.13	21.4874	1.50362		1974.62	19.3957	1.45726
1975.5	25.7468	1.50362	21.8592	1.46299		1975.13	24.5414	1.50362		1975.62	22.206	1.46527
1976.5	29.0924	1.50362	24.7341	1.4432		1976.13	27.8035	1.50362		1976.62	25.1059	1.43461
1977.5	32.6673	1.50362	27.6544	1.48691		1977.13	31.2914	1.50362		1977.62	27.9716	1.51694
1978.5	36.4692	1.50362	31.8998	1.12229		1978.13	35.0106	1.50362		1978.62	32.6121	1.12684
1979.5	40.4747	1.50362	34.9451	1.43484		1979.13	38.9449	1.50362		1979.62	35.3236	1.55558
1980.5	44.6486	1.50362	38.9387	1.34119		1980.13	43.0613	1.50362		1980.62	39.5615	1.33145
1981.5	48.9609	1.50362	42.9991	1.2302		1981.13	47.3251	1.50362		1981.62	43.7797	1.18506
1982.5	53.4013	1.50362	46.6	1.41869		1982.13	51.7166	1.50362		1982.62	46.9941	1.44352
1983.5	57.9915	1.50362	50.7143	1.31652		1983.13	56.2448	1.50362		1983.62	51.3046	1.31004
1984.5	62.7606	1.50362	53.9081	1.00592		1984.13	60.9442	1.50362		1984.62	54.3143	1.11734
1985.5	67.721	1.50362	59.5233	1.22514		1985.13	65.8315	1.50362		1985.62	60.2481	1.30905
1986.5	72.8848	1.50362	62.5644	1.11878		1986.13	70.9165	1.50362		1986.62	62.9009	1.25577
1987.5	78.2655	1.50361	68.4395	0.973294		1987.13	76.2147	1.50362		1987.62	68.8994	0.999612
1988.5	83.8609	1.50356	71.8658	1.3335		1988.13	81.7329	1.50359		1988.62	71.8959	1.36444
1989.5	89.6174	1.50339	78.0323	1.10169		1989.13	87.4435	1.50348		1989.62	78.3003	1.18212
1990.5	95.4344	1.50305	84.1084	1.13588		1990.13	93.2543	1.50321		1990.62	85.2975	1.31398
1991.5	101.216	1.50263	88.8426	0.920367		1991.13	99.0619	1.50278		1991.62	88.8803	0.835366
1992.5	106.903	1.50243	94.6428	0.703274		1992.13	104.788	1.50245		1992.62	95.8114	0.673469
1993.5	112.523	1.50211	99.1735	0.597748		1993.13	110.421	1.50242		1993.62	99.7152	0.577671
1994.5	118.107	1.49692	104.703	0.518487		1994.13	116.021	1.50058		1994.62	105.577	0.483427
1995.5	123.667	1.46935	109.737	0.488446		1995.13	121.582	1.48582		1995.62	110.934	0.480373
1996.5	129.268	1.38017	114.467	0.557257		1996.13	127.158	1.42775		1996.62	115.123	0.596266
1997.5	134.922	1.17286	119.506	0.502209		1997.13	132.799	1.27202		1997.62	120.178	0.500489
1998.5	140.571	0.832246	124.13	0.430934		1998.13	138.464	0.96828		1998.62	125.223	0.442614
1999.5	146.122	0.562378	129.502	0.424562		1999.13	144.044	0.612556		1999.62	130.605	0.415906
2000.5	152.05	0.535942	134.369	0.416083		2000.13	149.708	0.534755		2000.62	135.236	0.399072
2001.5	158.398	0.496104	139.6	0.435342		2001.13	156.049	0.519997		2001.62	140.813	0.431453
2002.5	164.271	0.442195	145.11	0.41504		2002.13	162.167	0.459112		2002.62	146.12	0.413725
2003.5	169.574	0.401551	149.726	0.418489		2003.13	167.667	0.411962		2003.62	150.904	0.419262
2004.5	174.626	0.395587	154.202	0.413634		2004.13	172.691	0.393683		2004.62	155.442	0.416004
2005.5	180.529	0.392632	159.632	0.431269		2005.13	178.093	0.396665		2005.62	160.841	0.430344
2006.5	187.697	0.385613	165.619	0.429845		2006.13	184.848	0.385815		2006.62	167.058	0.42767
2007.5	195.781	0.390995	172.874	0.441563		2007.13	192.64	0.388723		2007.62	174.124	0.412684
2008.5	204.235	0.394316	181.108	0.424955		2008.13	201.072	0.393083		2008.62	182.632	0.405993
2009.5	212.355	0.402147	188.615	0.47708		2009.13	209.436	0.397536		2009.62	190.115	0.516828
2010.5	219.466	0.404462	195.318	0.470241		2010.13	216.975	0.406464		2010.62	196.978	0.421387
2011.5	225.488	0.402131	202.951	0.468842		2011.13	223.394	0.402075		2011.62	204.559	0.488338
2012.5	230.912	0.405246	209.118	0.500163		2012.13	228.88	0.40332		2012.62	210.451	0.455026
2013.5	236.383	0.414246	214.228	0.503711		2013.13	234.343	0.411722		2013.62	215.444	0.509133
2014.5	241.582	0.410935	219.29	0.461722		2014.13	239.729	0.41402		2014.62	220.786	0.442894
2015.5	245.932	0.407925	223.687	0.448433		2015.13	244.448	0.406515		2015.62	224.942	0.444386
2016.5	249.659	0.430175	227.72	0.455613		2016.13	248.319	0.410716		2016.62	229.024	0.4569
						2017.13	251.838	0.55356

## Sheet: HCFC-141b
HCFC-141b
Mid-year						Mid-February				Mid-August
Year	NH	NH error	SH	SH error		Year	NH	NH error		Year	SH	SH error
1976.5	0	0	0	0		1976.13	0	0		1976.62	0	0
1977.5	0.00881817	0.453045	0.046112	0.33101		1977.13	0.000621598	0.452331		1977.62	0.0480783	0.225533
1978.5	0.0302957	0.454857	0.0498714	0.282851		1978.13	0.0223905	0.454212		1978.62	0.0497862	0.243134
1979.5	0.0504425	0.456355	0.0523356	0.238211		1979.13	0.0431841	0.455862		1979.62	0.0529633	0.253395
1980.5	0.0683098	0.457314	0.0587889	0.27269		1980.13	0.0620537	0.457058		1980.62	0.0596736	0.272748
1981.5	0.0829492	0.457512	0.0596999	0.26885		1981.13	0.0780508	0.457577		1981.62	0.0594646	0.268311
1982.5	0.0934121	0.456725	0.0629109	0.277206		1982.13	0.0902269	0.457194		1982.62	0.0637601	0.279641
1983.5	0.0987499	0.454728	0.0688331	0.257183		1983.13	0.0976333	0.455685		1983.62	0.0695203	0.252506
1984.5	0.0980648	0.451347	0.0681299	0.190424		1984.13	0.0993216	0.452826		1984.62	0.0689339	0.189502
1985.5	0.0919427	0.44781	0.0665812	0.238429		1985.13	0.0948251	0.448852		1985.62	0.0651009	0.240301
1986.5	0.0837875	0.448028	0.09145	0.232518		1986.13	0.0868124	0.446969		1986.62	0.0980645	0.239848
1987.5	0.0789315	0.450496	0.0770737	0.181581		1987.13	0.0792651	0.451539		1987.62	0.0653814	0.183874
1988.5	0.0881567	0.423536	0.0602198	0.256546		1988.13	0.0837055	0.43383		1988.62	0.0615348	0.252907
1989.5	0.0822645	0.433426	0.0695674	0.253126		1989.13	0.0870275	0.428401		1989.62	0.0702003	0.253311
1990.5	0.0762656	0.441214	0.0742619	0.256701		1990.13	0.0854262	0.438348		1990.62	0.0750332	0.259388
1991.5	0.0903706	0.446247	0.0885206	0.192516		1991.13	0.0429968	0.446723		1991.62	0.0918324	0.182359
1992.5	0.433456	0.441001	0.137984	0.190679		1992.13	0.298458	0.439323		1992.62	0.145424	0.183111
1993.5	1.17751	0.424646	0.386127	0.102898		1993.13	0.696104	0.439756		1993.62	0.43281	0.0912043
1994.5	3.3129	0.429071	1.14026	0.0842821		1994.13	2.36051	0.430226		1994.62	1.31349	0.0819004
1995.5	5.162	0.242286	2.4131	0.0826824		1995.13	4.34679	0.243144		1995.62	2.59126	0.084437
1996.5	7.28592	0.25468	4.02521	0.0907192		1996.13	6.46916	0.241946		1996.62	4.27967	0.0939471
1997.5	9.53882	0.537711	5.84848	0.0868359		1997.13	9.10763	0.502365		1997.62	6.0942	0.0825999
1998.5	11.1347	0.3605	7.53019	0.0699797		1998.13	10.1458	0.442893		1998.62	7.85141	0.069273
1999.5	13.22	0.207367	9.35401	0.0681622		1999.13	12.5993	0.200241		1999.62	9.64468	0.0675189
2000.5	15.0948	0.241916	11.0432	0.0704066		2000.13	14.3476	0.241872		2000.62	11.3561	0.0682245
2001.5	16.367	0.210658	12.5236	0.0703846		2001.13	16.113	0.240085		2001.62	12.7975	0.0684228
2002.5	17.6607	0.192558	13.9335	0.0727972		2002.13	17.1312	0.170593		2002.62	14.1965	0.0707557
2003.5	18.7537	0.163051	15.1586	0.0695186		2003.13	18.5508	0.161787		2003.62	15.4132	0.0706135
2004.5	19.0664	0.164549	16.0266	0.0680194		2004.13	19.1223	0.159265		2004.62	16.3005	0.0656292
2005.5	19.014	0.166279	16.5377	0.0737951		2005.13	18.9195	0.177134		2005.62	16.7234	0.0730875
2006.5	19.6285	0.16956	17.0079	0.0737285		2006.13	19.2931	0.167992		2006.62	17.2041	0.0718106
2007.5	20.2861	0.162843	17.5663	0.0805478		2007.13	20.2775	0.161461		2007.62	17.6909	0.0726406
2008.5	20.8652	0.164244	18.2148	0.0745435		2008.13	20.6567	0.158783		2008.62	18.3611	0.0699086
2009.5	21.3389	0.167611	18.7857	0.077955		2009.13	21.0752	0.160707		2009.62	18.9521	0.0801428
2010.5	21.9938	0.167768	19.2272	0.0829765		2010.13	21.7039	0.172681		2010.62	19.3862	0.0750641
2011.5	23.0159	0.164401	20.0205	0.0773758		2011.13	22.5184	0.163666		2011.62	20.203	0.0798377
2012.5	24.1321	0.163864	20.9171	0.0870965		2012.13	23.7699	0.169116		2012.62	21.0806	0.0766662
2013.5	25.0093	0.173184	21.8726	0.084158		2013.13	24.9005	0.173478		2013.62	22.0847	0.0844202
2014.5	25.4966	0.168577	22.5518	0.0781461		2014.13	25.2318	0.166656		2014.62	22.7772	0.0762642
2015.5	25.8506	0.163953	22.9689	0.0770547		2015.13	25.8627	0.162248		2015.62	23.1268	0.0763019
2016.5	26.1058	0.164735	23.3354	0.0788612		2016.13	26.0987	0.160804		2016.62	23.4872	0.0780899
						2017.13	26.1566	0.163282

## Sheet: HCFC-142b
HCFC-142b
Mid-year						Mid-February				Mid-August
Year	NH	NH error	SH	SH error		Year	NH	NH error		Year	SH	SH error
1935.5	0	0.527716	0	0.289603		1935.13	0	0.524371		1935.62	0	0.291315
1936.5	0.000243427	0.536732	7.70999e-05	0.303739		1936.13	0	0.53333		1936.62	0.000348205	0.305489
1937.5	0.00697323	0.545738	0.00226502	0.317857		1937.13	0.00445721	0.542383		1937.62	0.00253885	0.319594
1938.5	0.0136385	0.554459	0.00453175	0.331529		1938.13	0.0111564	0.551254		1938.62	0.00481779	0.3332
1939.5	0.0201771	0.562622	0.00695334	0.344324		1939.13	0.0177522	0.55967		1939.62	0.0072611	0.345876
1940.5	0.0265266	0.569952	0.00960586	0.355814		1940.13	0.0241823	0.567355		1940.62	0.00994485	0.357194
1941.5	0.0326249	0.576175	0.0125654	0.365568		1941.13	0.0303844	0.574037		1941.62	0.0129451	0.366722
1942.5	0.0384096	0.581017	0.015908	0.373158		1942.13	0.0362963	0.579441		1942.62	0.0163379	0.374032
1943.5	0.0438186	0.584204	0.0197097	0.378153		1943.13	0.0418558	0.583291		1943.62	0.0201993	0.378692
1944.5	0.0487895	0.585462	0.0240466	0.380125		1944.13	0.0470006	0.585316		1944.62	0.0246055	0.380274
1945.5	0.0532601	0.584516	0.0289947	0.378644		1945.13	0.0516684	0.585239		1945.62	0.0296323	0.378347
1946.5	0.0571682	0.581094	0.0346302	0.373282		1946.13	0.055797	0.582787		1946.62	0.035356	0.372482
1947.5	0.0604514	0.574921	0.041029	0.36361		1947.13	0.0593242	0.577685		1947.62	0.0418526	0.362248
1948.5	0.0630476	0.565723	0.0482673	0.349201		1948.13	0.0621875	0.56966		1948.62	0.0491982	0.347216
1949.5	0.0648945	0.553227	0.0564212	0.329627		1949.13	0.0643249	0.558437		1949.62	0.0574687	0.326956
1950.5	0.0659304	0.537161	0.0655658	0.30447		1950.13	0.065674	0.543742		1950.62	0.0667402	0.301039
1951.5	0.0661624	0.517548	0.0756964	0.273761		1951.13	0.0661856	0.525356		1951.62	0.0769935	0.269584
1952.5	0.0658309	0.495411	0.0865353	0.239099		1952.13	0.0660145	0.503939		1952.62	0.0879092	0.234441
1953.5	0.0652628	0.472146	0.0977037	0.202669		1953.13	0.0654838	0.480872		1953.62	0.0991068	0.197812
1954.5	0.0647866	0.449158	0.108821	0.166663		1954.13	0.0649219	0.457561		1954.62	0.110206	0.1619
1955.5	0.0647307	0.427853	0.119507	0.133271		1955.13	0.0646572	0.43541		1955.62	0.120826	0.128907
1956.5	0.0654236	0.409635	0.129381	0.104678		1956.13	0.0650182	0.415826		1956.62	0.130587	0.101036
1957.5	0.0671936	0.395914	0.138062	0.0830809		1957.13	0.0663332	0.400213		1957.62	0.139107	0.0804882
1958.5	0.0703691	0.3881	0.145171	0.0707255		1958.13	0.0689308	0.389977		1958.62	0.146007	0.0694712
1959.5	0.0752786	0.387604	0.150326	0.0699399		1959.13	0.0731393	0.386523		1959.62	0.150906	0.070195
1960.5	0.0822505	0.395839	0.153147	0.0830133		1960.13	0.079287	0.391258		1960.62	0.153424	0.0848665
1961.5	0.0916132	0.414215	0.153253	0.112071		1961.13	0.0877026	0.405585		1961.62	0.15318	0.115684
1962.5	0.103695	0.444142	0.150265	0.159203		1962.13	0.0987143	0.430913		1962.62	0.149793	0.164843
1963.5	0.118825	0.487022	0.143801	0.226568		1963.13	0.112651	0.468644		1963.62	0.142883	0.234547
1964.5	0.137327	0.544231	0.133494	0.3163		1964.13	0.12984	0.520185		1964.62	0.132075	0.326969
1965.5	0.159365	0.616064	0.119524	0.427763		1965.13	0.150567	0.586654		1965.62	0.117665	0.441036
1966.5	0.184719	0.700313	0.103377	0.554131		1966.13	0.174728	0.666621		1966.62	0.101302	0.569135
1967.5	0.213072	0.794158	0.0868671	0.687067		1967.13	0.202007	0.757275		1967.62	0.0848043	0.702838
1968.5	0.244108	0.894776	0.0718139	0.81819		1968.13	0.232087	0.855792		1968.62	0.0699899	0.833714
1969.5	0.277507	0.99935	0.0600358	0.939101		1969.13	0.26465	0.959344		1969.62	0.0586777	0.953331
1970.5	0.312953	1.10506	0.0533512	1.04139		1970.13	0.299379	1.06511		1970.62	0.0526861	1.05326
1971.5	0.350128	1.20908	0.0535785	1.11666		1971.13	0.335956	1.17025		1971.62	0.0538336	1.12506
1972.5	0.388714	1.3086	0.0625363	1.1565		1972.13	0.374062	1.27196		1972.62	0.0639387	1.16032
1973.5	0.428393	1.40079	0.082043	1.15253		1973.13	0.413382	1.3674		1973.62	0.0848199	1.15059
1974.5	0.468849	1.48282	0.113917	1.09643		1974.13	0.453596	1.45374		1974.62	0.118296	1.08744
1975.5	0.509762	1.55189	0.159977	0.979949		1975.13	0.494387	1.52817		1975.62	0.166184	0.962471
1976.5	0.550817	1.60516	0.222041	0.795209		1976.13	0.535438	1.58784		1976.62	0.230305	0.767268
1977.5	0.591694	1.63981	0.301929	0.535793		1977.13	0.576431	1.62995		1977.62	0.312475	0.493542
1978.5	0.632076	1.65302	0.39491	0.237749		1978.13	0.617049	1.65167		1978.62	0.410507	0.182782
1979.5	0.671646	1.64199	0.392896	0.26016		1979.13	0.656973	1.65015		1979.62	0.384852	0.283548
1980.5	0.710086	1.60388	0.38119	0.285407		1980.13	0.695886	1.62259		1980.62	0.381824	0.280598
1981.5	0.747078	1.5359	0.520486	0.253864		1981.13	0.73347	1.56616		1981.62	0.546528	0.247079
1982.5	0.782306	1.43526	0.518668	0.244108		1982.13	0.769409	1.47803		1982.62	0.496097	0.250944
1983.5	0.81545	1.29918	0.623623	0.256132		1983.13	0.803383	1.35538		1983.62	0.649287	0.253551
1984.5	0.846193	1.12495	0.766695	0.187748		1984.13	0.835075	1.19538		1984.62	0.792185	0.185597
1985.5	0.874218	0.910017	0.814563	0.235601		1985.13	0.864169	0.995229		1985.62	0.80213	0.239364
1986.5	0.899208	0.65238	0.839468	0.203232		1986.13	0.890346	0.75212		1986.62	0.853143	0.200561
1987.5	0.905123	0.439296	0.834133	0.161547		1987.13	0.912949	0.46514		1987.62	0.830631	0.151986
1988.5	0.930715	0.422694	0.836576	0.25772		1988.13	0.898116	0.44484		1988.62	0.832877	0.268555
1989.5	1.10912	0.449885	1.04027	0.247284		1989.13	0.990668	0.441898		1989.62	1.08958	0.239309
1990.5	1.92276	0.470497	1.30815	0.251935		1990.13	1.54059	0.456706		1990.62	1.31971	0.260858
1991.5	2.65476	0.494581	1.69237	0.171497		1991.13	2.39866	0.496362		1991.62	1.76379	0.143063
1992.5	3.82509	0.460845	2.55094	0.118826		1992.13	3.25022	0.462217		1992.62	2.60676	0.108936
1993.5	5.41708	0.515788	3.69069	0.106028		1993.13	4.84435	0.498617		1993.62	3.7807	0.0929367
1994.5	6.85791	0.403223	4.81427	0.0867453		1994.13	6.34891	0.495806		1994.62	5.00365	0.0837901
1995.5	7.78963	0.219282	5.82368	0.0811723		1995.13	7.48008	0.220694		1995.62	5.97968	0.0813906
1996.5	9.10603	0.218624	6.92783	0.0875716		1996.13	8.54805	0.218624		1996.62	7.09105	0.091292
1997.5	10.5964	0.223581	7.96845	0.0798603		1997.13	10.0786	0.218677		1997.62	8.1095	0.0792131
1998.5	11.5415	0.268917	8.907	0.0673309		1998.13	11.2734	0.31024		1998.62	9.06148	0.0666619
1999.5	12.4643	0.184491	9.95966	0.0667155		1999.13	12.0633	0.177871		1999.62	10.0943	0.0658799
2000.5	13.6574	0.218422	10.9643	0.0663541		2000.13	13.1873	0.218265		2000.62	11.1382	0.0645782
2001.5	14.5765	0.186711	11.9248	0.0668459		2001.13	14.4056	0.213537		2001.62	12.0581	0.0652665
2002.5	15.032	0.170958	12.8319	0.0675286		2002.13	14.8582	0.159657		2002.62	12.9954	0.0664592
2003.5	15.6874	0.145721	13.5158	0.0664593		2003.13	15.4456	0.146595		2003.62	13.6691	0.0673442
2004.5	16.2951	0.148127	14.099	0.0669639		2004.13	16.1174	0.14441		2004.62	14.1943	0.0662273
2005.5	16.9467	0.14783	14.6938	0.0692301		2005.13	16.4726	0.155287		2005.62	14.7757	0.0698812
2006.5	18.02	0.142614	15.4414	0.0702362		2006.13	17.6023	0.144461		2006.62	15.5783	0.0685029
2007.5	19.3105	0.146661	16.5358	0.0717403		2007.13	18.7704	0.145737		2007.62	16.7224	0.0669797
2008.5	20.5487	0.147448	17.7995	0.0703518		2008.13	20.0105	0.14499		2008.62	18.0085	0.0666803
2009.5	21.6268	0.150548	18.8912	0.0777372		2009.13	21.3696	0.145518		2009.62	19.0555	0.0783454
2010.5	21.9306	0.149587	19.6898	0.0799572		2010.13	21.5867	0.154745		2010.62	19.8342	0.0702967
2011.5	22.6315	0.148305	20.4888	0.0792908		2011.13	22.1883	0.14854		2011.62	20.6616	0.0785899
2012.5	22.9322	0.147992	21.1229	0.0847084		2012.13	22.7878	0.151902		2012.62	21.2032	0.0757345
2013.5	23.2722	0.15552	21.5411	0.0814096		2013.13	23.1203	0.155363		2013.62	21.639	0.0817586
2014.5	23.6069	0.151984	21.7586	0.0751056		2014.13	23.4577	0.151139		2014.62	21.8265	0.0730718
2015.5	23.3999	0.147672	21.7554	0.0730355		2015.13	23.4304	0.145796		2015.62	21.8045	0.0728209
2016.5	23.4335	0.148747	21.9467	0.0742863		2016.13	23.4067	0.146046		2016.62	21.999	0.0745836
						2017.13	23.498	0.151206

## Sheet: HFC-134a
HFC-134a
Mid-year						Mid-February				Mid-August
Year	NH	NH error	SH	SH error		Year	NH	NH error		Year	SH	SH error
1973.5	0	1.01018	0	0		1973.13	0	1.14561		1973.62	0	0
1974.5	0	0.732099	0	0		1974.13	0	0.793105		1974.62	0	0
1975.5	0	0.682342	0	0		1975.13	0	0.675525		1975.62	0	0
1976.5	0	0.728614	0	0		1976.13	0	0.708777		1976.62	0	0
1977.5	0	0.765559	0	0		1977.13	0	0.756977		1977.62	0	0
1978.5	0	0.76127	0.0182786	0.615345		1978.13	0	0.769696		1978.62	0.0140444	0.475286
1979.5	0.000340712	0.724324	0.0183647	0.75687		1979.13	9.66459e-05	0.740991		1979.62	0.0192283	0.785842
1980.5	0.00131157	0.679157	0.0105125	0.791237		1980.13	0.000854761	0.695135		1980.62	0.00882651	0.786231
1981.5	0.00291824	0.640041	0.00781093	0.714017		1981.13	0.00221128	0.653258		1981.62	0.00814359	0.703065
1982.5	0.0052	0.618384	0.0251064	0.678018		1982.13	0.00424097	0.62141		1982.62	0.0279938	0.675806
1983.5	0.00787797	0.638699	0.0323948	0.671038		1983.13	0.00688964	0.624939		1983.62	0.0327519	0.670746
1984.5	0.00970694	0.672542	0.00180466	0.648915		1984.13	0.00931941	0.662511		1984.62	0	0.644181
1985.5	0.00860051	0.674475	0	0.654871		1985.13	0.00969193	0.680706		1985.62	0	0.657253
1986.5	0.00190687	0.635238	0.0157066	0.686165		1986.13	0.00554467	0.655165		1986.62	0.0197114	0.703699
1987.5	0	0.574195	0.0188601	0.492806		1987.13	0	0.598101		1987.62	0.0174889	0.488055
1988.5	0	0.51385	0.00984607	0.668025		1988.13	0	0.5335		1988.62	0.00912305	0.686061
1989.5	0	0.491809	0.0119152	0.606643		1989.13	0	0.491144		1989.62	0.0116499	0.593533
1990.5	0	0.507327	0.0243831	0.441469		1990.13	0	0.49989		1990.62	0.0322979	0.456542
1991.5	0	0.52172	0.024287	0.442991		1991.13	0	0.518157		1991.62	0.022535	0.428573
1992.5	0.0821084	0.518488	0.0362235	0.395218		1992.13	0	0.523826		1992.62	0.0408111	0.366108
1993.5	0.471267	0.480261	0.0917841	0.422343		1993.13	0.278096	0.501268		1993.62	0.102035	0.380508
1994.5	1.22121	0.405408	0.34029	0.306796		1994.13	0.872147	0.436363		1994.62	0.379381	0.328136
1995.5	2.46447	0.334243	1.05631	0.201029		1995.13	1.91035	0.354117		1995.62	1.15343	0.205725
1996.5	4.30355	0.308338	2.10321	0.215262		1996.13	3.51728	0.31153		1996.62	2.26041	0.217687
1997.5	6.76311	0.303842	3.8854	0.238489		1997.13	5.74459	0.306294		1997.62	4.23396	0.230224
1998.5	9.8072	0.284188	5.88147	0.176017		1998.13	8.58726	0.294846		1998.62	6.21962	0.170094
1999.5	13.2625	0.264394	8.44214	0.168909		1999.13	11.9206	0.267057		1999.62	8.85053	0.166164
2000.5	16.9882	0.266352	11.6248	0.169496		2000.13	15.5531	0.265573		2000.62	12.1416	0.163366
2001.5	20.9804	0.253185	14.6322	0.174442		2001.13	19.4376	0.26202		2001.62	14.9713	0.165547
2002.5	25.3006	0.22844	18.4771	0.175526		2002.13	23.6276	0.237218		2002.62	19.0846	0.173678
2003.5	29.8924	0.209153	22.0449	0.167499		2003.13	28.1468	0.214294		2003.62	22.6572	0.169608
2004.5	34.5547	0.203314	26.1274	0.165082		2004.13	32.8101	0.204049		2004.62	26.6413	0.164664
2005.5	39.1936	0.20051	30.5845	0.171658		2005.13	37.4591	0.201619		2005.62	31.2983	0.17591
2006.5	43.7725	0.200406	34.8951	0.17704		2006.13	42.0687	0.199723		2006.62	35.5748	0.173295
2007.5	48.3646	0.205475	39.1165	0.181195		2007.13	46.6207	0.202813		2007.62	39.7509	0.167709
2008.5	53.1677	0.210797	43.5894	0.178758		2008.13	51.3265	0.209611		2008.62	44.1818	0.166065
2009.5	58.2045	0.208643	47.9681	0.194619		2009.13	56.2917	0.210295		2009.62	48.6239	0.201794
2010.5	63.3352	0.204408	52.7325	0.195561		2010.13	61.4051	0.20576		2010.62	53.5587	0.179686
2011.5	68.4601	0.201858	57.7904	0.192884		2011.13	66.5502	0.202489		2011.62	58.6434	0.201717
2012.5	73.5593	0.203817	62.7339	0.2115		2012.13	71.639	0.202142		2012.62	63.4845	0.188343
2013.5	78.805	0.208717	67.5598	0.210378		2013.13	76.8	0.207219		2013.62	68.372	0.212346
2014.5	84.3574	0.210889	72.6154	0.19422		2014.13	82.2227	0.210285		2014.62	73.5508	0.187982
2015.5	90.2496	0.21044	77.9584	0.188762		2015.13	87.9871	0.211053		2015.62	78.9489	0.187971
2016.5	96.4179	0.230496	83.6447	0.188151		2016.13	94.085	0.211491		2016.62	84.5892	0.186513
						2017.13	100.307	0.306043

## Sheet: HFC-125
HFC-125
Mid-year						Mid-February				Mid-August
Year	NH	NH error	SH	SH error		Year	NH	NH error		Year	SH	SH error
1972.2	0	0	0	0		1972.13	0	0		1972.62	0	0
1973.5	0.0370295	0.33988	0	0		1973.13	0.017083	0.396355		1973.62	0	0
1974.5	0.0921816	0.285938	0	0		1974.13	0.0831153	0.26065		1974.62	0	0
1975.5	0.092448	0.313373	0	0		1975.13	0.130657	0.305818		1975.62	0	0
1976.5	0	0.345618	0	0		1976.13	0	0.337424		1976.62	0	0
1977.5	0	0.355965	0	0		1977.13	0	0.353407		1977.62	0	0
1978.5	0.176711	0.35607	0.00809951	0.154057		1978.13	0.112477	0.361686		1978.62	0.00955943	0.132645
1979.5	0.157888	0.299953	0.0183536	0.205972		1979.13	0.208535	0.327333		1979.62	0.019567	0.217073
1980.5	0.0180601	0.285017	0.0263568	0.258344		1980.13	0.0572299	0.261927		1980.62	0.0272849	0.262975
1981.5	0.0113341	0.419445	0.0321834	0.262392		1981.13	0	0.384085		1981.62	0.032844	0.261417
1982.5	0.0466202	0.276798	0.0359774	0.233583		1982.13	0.0488938	0.3295		1982.62	0.0363887	0.228741
1983.5	0.0896474	0.391656	0.037883	0.187969		1983.13	0.0628514	0.340209		1983.62	0.0380629	0.181314
1984.5	0.114999	0.448952	0.0387004	0.146636		1984.13	0.115413	0.444473		1984.62	0.0387511	0.141546
1985.5	0.104491	0.422725	0.0414399	0.14425		1985.13	0.108477	0.440246		1985.62	0.0419095	0.145782
1986.5	0.121238	0.373289	0.0413605	0.137217		1986.13	0.105193	0.389734		1986.62	0.0410418	0.133921
1987.5	0.199989	0.351252	0.0395847	0.133939		1987.13	0.165308	0.353883		1987.62	0.0394539	0.13532
1988.5	0.239627	0.350282	0.0414749	0.143846		1988.13	0.245664	0.350447		1988.62	0.0418425	0.144879
1989.5	0.178337	0.345695	0.0452351	0.128919		1989.13	0.186661	0.346507		1989.62	0.0457476	0.125733
1990.5	0.334383	0.358124	0.0472736	0.120784		1990.13	0.249607	0.351355		1990.62	0.0473949	0.122106
1991.5	0.46808	0.367823	0.0446072	0.134837		1991.13	0.446666	0.366678		1991.62	0.0441123	0.136624
1992.5	0.449895	0.364812	0.0397051	0.146666		1992.13	0.473072	0.367186		1992.62	0.0389863	0.148086
1993.5	0.370145	0.357953	0.0430505	0.139951		1993.13	0.400804	0.360299		1993.62	0.0438065	0.138234
1994.5	0.361774	0.352872	0.0700898	0.102657		1994.13	0.336826	0.354758		1994.62	0.074348	0.0958527
1995.5	0.490003	0.346087	0.132518	0.0726037		1995.13	0.435725	0.349153		1995.62	0.141532	0.0691297
1996.5	0.594633	0.356161	0.23298	0.07329		1996.13	0.561307	0.341897		1996.62	0.246349	0.0736539
1997.5	0.769159	0.362903	0.401291	0.0719218		1997.13	0.672539	0.384076		1997.62	0.425238	0.0729069
1998.5	1.12444	0.217823	0.649295	0.0571117		1998.13	0.995312	0.250315		1998.62	0.683457	0.0535493
1999.5	1.41057	0.157093	0.908136	0.0515457		1999.13	1.28574	0.153807		1999.62	0.938501	0.0516393
2000.5	1.75955	0.158867	1.19707	0.0539036		2000.13	1.57643	0.143342		2000.62	1.23681	0.0540419
2001.5	2.26787	0.194691	1.5504	0.0533215		2001.13	2.1269	0.235207		2001.62	1.59534	0.052833
2002.5	2.65856	0.161885	1.94294	0.0535583		2002.13	2.44003	0.16195		2002.62	1.99338	0.0536006
2003.5	3.30339	0.182088	2.39669	0.0515731		2003.13	3.03269	0.156251		2003.62	2.45632	0.0512006
2004.5	3.91322	0.154319	2.93186	0.0517623		2004.13	3.61984	0.15252		2004.62	3.00141	0.0520872
2005.5	4.57977	0.147075	3.49837	0.0511923		2005.13	4.32188	0.146879		2005.62	3.56976	0.0513656
2006.5	5.38673	0.153651	4.15578	0.0500929		2006.13	5.04751	0.14139		2006.62	4.24229	0.0496198
2007.5	6.36002	0.126935	4.93385	0.0433819		2007.13	5.92349	0.116865		2007.62	5.03495	0.0428371
2008.5	7.48697	0.108405	5.8536	0.0390653		2008.13	7.05033	0.110425		2008.62	5.9738	0.038693
2009.5	8.61646	0.119025	6.86818	0.039742		2009.13	8.15601	0.0990473		2009.62	6.99749	0.0395682
2010.5	10.0263	0.11444	7.97529	0.0406689		2010.13	9.54036	0.128829		2010.62	8.11796	0.0403874
2011.5	11.7073	0.105054	9.32492	0.0393612		2011.13	10.9421	0.102114		2011.62	9.50535	0.0392434
2012.5	13.4994	0.108916	10.8782	0.0406612		2012.13	12.8856	0.100008		2012.62	11.076	0.0403842
2013.5	15.6811	0.134247	12.6502	0.0410938		2013.13	15.0224	0.108052		2013.62	12.8841	0.0412161
2014.5	17.6934	0.129156	14.5117	0.0390631		2014.13	17.1045	0.121606		2014.62	14.7439	0.0389666
2015.5	19.9789	0.154654	16.6541	0.049893		2015.13	18.9531	0.139407		2015.62	16.9438	0.0523217
2016.5	22.6135	0.162511	19.0656	0.0609706		2016.13	21.6794	0.160155		2016.62	19.3703	0.0595449
						2017.13	24.4976	0.215831

## Sheet: HFC-23
HFC-23
Mid-year						Mid-February				Mid-August
Year	NH	NH error	SH	SH error		Year	NH	NH error		Year	SH	SH error
1978.5	3.59048	0.0313196	3.16414	0.0356952		1978.13	3.4603	0.0346717		1978.62	3.21144	0.0324042
1979.5	3.97675	0.0300537	3.50952	0.0335261		1979.13	3.81535	0.029924		1979.62	3.55666	0.034275
1980.5	4.40649	0.0300583	3.88748	0.0342134		1980.13	4.23538	0.0300063		1980.62	3.94032	0.0342525
1981.5	4.85308	0.0300467	4.29905	0.0342048		1981.13	4.67895	0.0299028		1981.62	4.35593	0.0342846
1982.5	5.24652	0.0300307	4.71728	0.034211		1982.13	5.10792	0.0299204		1982.62	4.77341	0.0342846
1983.5	5.45296	0.0300742	5.09713	0.0337373		1983.13	5.40986	0.0300714		1983.62	5.14468	0.0342109
1984.5	5.70274	0.0300583	5.36416	0.0325682		1984.13	5.58236	0.0300063		1984.62	5.38832	0.0327686
1985.5	6.11043	0.0300484	5.66211	0.0339797		1985.13	5.92917	0.0299028		1985.62	5.70583	0.034254
1986.5	6.60615	0.0300254	6.05404	0.0326705		1986.13	6.40392	0.029924		1986.62	6.11392	0.0335037
1987.5	6.95912	0.0300793	6.48845	0.0331159		1987.13	6.8606	0.0300304		1987.62	6.54526	0.0333964
1988.5	7.59001	0.0300557	6.89797	0.0330695		1988.13	7.26272	0.0300063		1988.62	6.95311	0.0327094
1989.5	8.06939	0.0300483	7.47542	0.0321457		1989.13	7.95816	0.0299749		1989.62	7.55024	0.0327978
1990.5	8.61899	0.030052	7.98784	0.0319023		1990.13	8.35702	0.029924		1990.62	8.05377	0.0336362
1991.5	9.15622	0.0300533	8.53216	0.0325333		1991.13	8.97695	0.0299204		1991.62	8.61287	0.0319335
1992.5	9.67207	0.0300583	9.03855	0.0313126		1992.13	9.46385	0.0300063		1992.62	9.11016	0.032098
1993.5	10.3265	0.0300484	9.58972	0.0321643		1993.13	10.0479	0.0299028		1993.62	9.66209	0.0326273
1994.5	11.0173	0.0300537	10.2121	0.0313972		1994.13	10.7554	0.029924		1994.62	10.2853	0.0318649
1995.5	11.7245	0.0300537	10.877	0.0302299		1995.13	11.4449	0.029924		1995.62	10.9856	0.0297387
1996.5	12.4716	0.0300583	11.5427	0.0300774		1996.13	12.1778	0.0300063		1996.62	11.6414	0.0292977
1997.5	13.2765	0.0300484	12.2821	0.0298171		1997.13	12.9555	0.0299028		1997.62	12.3934	0.0298989
1998.5	14.0664	0.0300537	13.063	0.0322791		1998.13	13.7703	0.029924		1998.62	13.1697	0.031429
1999.5	14.8318	0.0300537	13.8359	0.0309273		1999.13	14.5388	0.029924		1999.62	13.9371	0.0311843
2000.5	15.6895	0.0300368	14.6188	0.0319736		2000.13	15.336	0.0300063		2000.62	14.7271	0.0323563
2001.5	16.381	0.0300678	15.4169	0.0326824		2001.13	16.1705	0.0299842		2001.62	15.5281	0.0322112
2002.5	17.0487	0.0300537	16.1153	0.0331108		2002.13	16.7706	0.029924		2002.62	16.2084	0.0328571
2003.5	17.7578	0.0300537	16.8274	0.0311141		2003.13	17.488	0.029924		2003.62	16.9221	0.0317099
2004.5	18.6167	0.0300583	17.5722	0.0304689		2004.13	18.2475	0.0300063		2004.62	17.6751	0.0322583
2005.5	19.5941	0.0300484	18.4041	0.0300309		2005.13	19.2105	0.0299028		2005.62	18.5229	0.0297223
2006.5	20.7945	0.0300455	19.3643	0.0310716		2006.13	20.2807	0.029924		2006.62	19.5008	0.0301711
2007.5	21.6481	0.0278064	20.4036	0.0300643		2007.13	21.4309	0.0300116		2007.62	20.5362	0.0303521
2008.5	22.4993	0.0231423	21.3246	0.0246677		2008.13	22.1325	0.0231547		2008.62	21.4584	0.0243485
2009.5	23.0706	0.0232321	22.1404	0.025854		2009.13	22.8885	0.0230946		2009.62	22.2523	0.0252915
2010.5	23.7206	0.0299055	22.7022	0.0354995		2010.13	23.4286	0.0294623		2010.62	22.7647	0.0348177
2011.5	24.6309	0.03005	23.5601	0.0342133		2011.13	24.2161	0.0300533		2011.62	23.6772	0.0342106
2012.5	25.5504	0.0300564	24.3384	0.0342106		2012.13	25.1522	0.030066		2012.62	24.4469	0.0342106
2013.5	26.683	0.0300532	25.2454	0.0342106		2013.13	26.2822	0.0300533		2013.62	25.3837	0.0342106
2014.5	27.8595	0.0300532	26.2925	0.0342106		2014.13	27.3045	0.0300533		2014.62	26.4316	0.0342106
2015.5	28.8111	0.0300532	27.3855	0.0342107		2015.13	28.4915	0.0300532		2015.62	27.5581	0.0342106
2016.5	29.5878	0.0300739	28.3184	0.0344869		2016.13	29.2529	0.0300533		2016.62	28.4461	0.0345322
						2017.13	30.201	0.0351232

## Sheet: PFC-14
PFC-14
Mid-year						Mid-February				Mid-August
Year	NH	NH error	SH	SH error		Year	NH	NH error		Year	SH	SH error
1900.5	34.0525	0.0964652	34.051	0.0741959		1900.13	34.0514	0.103253		1900.62	34.0512	0.0726408
1901.5	34.0555	0.0746053	34.053	0.059057		1901.13	34.0544	0.0823115		1901.62	34.0532	0.0568354
1902.5	34.0584	0.0648648	34.055	0.052063		1902.13	34.0573	0.0651336		1902.62	34.0553	0.0518559
1903.5	34.0613	0.0653517	34.0575	0.0522215		1903.13	34.0602	0.0656515		1903.62	34.0578	0.0521734
1904.5	34.0646	0.0645553	34.0604	0.0517655		1904.13	34.0632	0.0645989		1904.62	34.0608	0.0517509
1905.5	34.0691	0.0646611	34.064	0.0518428		1905.13	34.0671	0.0646578		1905.62	34.0644	0.0518457
1906.5	34.0749	0.0646267	34.0685	0.0518194		1906.13	34.0726	0.0646283		1906.62	34.0692	0.0518185
1907.5	34.0817	0.0646344	34.0743	0.051825		1907.13	34.0791	0.0646343		1907.62	34.075	0.0518253
1908.5	34.0888	0.0646321	34.0806	0.0518235		1908.13	34.086	0.0646321		1908.62	34.0814	0.0518234
1909.5	34.0988	0.0646327	34.0881	0.0518239		1909.13	34.0943	0.0646327		1909.62	34.089	0.0518239
1910.5	34.1138	0.0646325	34.0984	0.0518238		1910.13	34.1075	0.0646325		1910.62	34.0999	0.0518238
1911.5	34.1317	0.0646326	34.1121	0.0518238		1911.13	34.1247	0.0646325		1911.62	34.1139	0.0518238
1912.5	34.1516	0.0646325	34.1283	0.0518238		1912.13	34.1437	0.0646325		1912.62	34.1304	0.0518238
1913.5	34.1735	0.0646325	34.1468	0.0518238		1913.13	34.1651	0.0646325		1913.62	34.1492	0.0518238
1914.5	34.1967	0.0646325	34.1675	0.0518238		1914.13	34.1877	0.0646325		1914.62	34.1701	0.0518238
1915.5	34.2237	0.0646325	34.1906	0.0518238		1915.13	34.2125	0.0646325		1915.62	34.1936	0.0518238
1916.5	34.2587	0.0646325	34.2181	0.0518238		1916.13	34.2441	0.0646325		1916.62	34.2217	0.0518238
1917.5	34.3012	0.0646325	34.252	0.0518238		1917.13	34.2846	0.0646325		1917.62	34.2565	0.0518238
1918.5	34.3452	0.0646325	34.2907	0.0518238		1918.13	34.329	0.0646325		1918.62	34.2957	0.0518238
1919.5	34.3856	0.0646325	34.3303	0.0518238		1919.13	34.3714	0.0646325		1919.62	34.3353	0.0518238
1920.5	34.4189	0.0646325	34.3677	0.0518238		1920.13	34.4078	0.0646325		1920.62	34.3723	0.0518238
1921.5	34.4419	0.0646325	34.3993	0.0518238		1921.13	34.4348	0.0646325		1921.62	34.4029	0.0518238
1922.5	34.4654	0.0646325	34.4262	0.0518238		1922.13	34.4544	0.0646325		1922.62	34.4294	0.0518238
1923.5	34.5067	0.0646325	34.4577	0.0518238		1923.13	34.488	0.0646325		1923.62	34.462	0.0518238
1924.5	34.563	0.0646325	34.4999	0.0518238		1924.13	34.5407	0.0646325		1924.62	34.5055	0.0518238
1925.5	34.6232	0.0646325	34.5504	0.0518238		1925.13	34.6005	0.0646325		1925.62	34.5569	0.0518238
1926.5	34.6857	0.0646325	34.6061	0.0518238		1926.13	34.6615	0.0646325		1926.62	34.6132	0.0518238
1927.5	34.7556	0.0646325	34.6672	0.0518238		1927.13	34.7278	0.0646325		1927.62	34.675	0.0518238
1928.5	34.8363	0.0646325	34.7359	0.0518238		1928.13	34.8044	0.0646325		1928.62	34.7447	0.0518238
1929.5	34.9234	0.0646325	34.8126	0.0518238		1929.13	34.8907	0.0646325		1929.62	34.8224	0.0518238
1930.5	35.0034	0.0646325	34.8919	0.0518238		1930.13	34.9759	0.0646325		1930.62	34.9018	0.0518238
1931.5	35.0621	0.0646325	34.9641	0.0518238		1931.13	35.0442	0.0646325		1931.62	34.9728	0.0518238
1932.5	35.0973	0.0646325	35.0209	0.0518238		1932.13	35.087	0.0646325		1932.62	35.0274	0.0518238
1933.5	35.1246	0.0646325	35.0638	0.0518238		1933.13	35.1135	0.0646325		1933.62	35.0687	0.0518238
1934.5	35.1656	0.0646325	35.1037	0.0518238		1934.13	35.1465	0.0646325		1934.62	35.1087	0.0518238
1935.5	35.2357	0.0646325	35.1547	0.0518238		1935.13	35.204	0.0646325		1935.62	35.1615	0.0518238
1936.5	35.3399	0.0646325	35.2272	0.0518238		1936.13	35.2957	0.0646325		1936.62	35.237	0.0518238
1937.5	35.4754	0.0646325	35.3263	0.0518238		1937.13	35.4203	0.0646325		1937.62	35.3395	0.0518238
1938.5	35.6349	0.0646325	35.4516	0.0518238		1938.13	35.5721	0.0646325		1938.62	35.4681	0.0518238
1939.5	35.8133	0.0646325	35.6002	0.0518238		1939.13	35.7435	0.0646325		1939.62	35.6195	0.0518238
1940.5	36.0135	0.0646325	35.7694	0.0518238		1940.13	35.9339	0.0646325		1940.62	35.791	0.0518238
1941.5	36.2656	0.0646325	35.9685	0.0518238		1941.13	36.1586	0.0646325		1941.62	35.9944	0.0518238
1942.5	36.6076	0.0646325	36.2229	0.0518238		1942.13	36.4645	0.0646325		1942.62	36.2567	0.0518238
1943.5	37.0158	0.0646325	36.5453	0.0518238		1943.13	36.8607	0.0646325		1943.62	36.5884	0.0518238
1944.5	37.3547	0.0646325	36.8888	0.0518238		1944.13	37.2539	0.0646325		1944.62	36.9319	0.0518238
1945.5	37.5147	0.0646325	37.1639	0.0518238		1945.13	37.4812	0.0646325		1945.62	37.1946	0.0518238
1946.5	37.5855	0.0646325	37.344	0.0518238		1946.13	37.5572	0.0646325		1946.62	37.3633	0.0518238
1947.5	37.7026	0.0646325	37.4854	0.0518238		1947.13	37.6467	0.0646325		1947.62	37.5027	0.0518238
1948.5	37.8764	0.0646325	37.6389	0.0518238		1948.13	37.8069	0.0646325		1948.62	37.6589	0.0518238
1949.5	38.0608	0.0646325	37.8091	0.0518238		1949.13	37.9927	0.0646325		1949.62	37.8307	0.0518238
1950.5	38.2443	0.0646325	37.9858	0.0518238		1950.13	38.1742	0.0646325		1950.62	38.0079	0.0518238
1951.5	38.4413	0.0646325	38.1697	0.0518238		1951.13	38.3646	0.0646325		1951.62	38.1929	0.0518238
1952.5	38.6548	0.0646325	38.3654	0.0518238		1952.13	38.5727	0.0646325		1952.62	38.3902	0.0518238
1953.5	38.8818	0.0646325	38.5742	0.0518238		1953.13	38.7947	0.0646325		1953.62	38.6007	0.0518238
1954.5	39.1172	0.0646325	38.7945	0.0518238		1954.13	39.0287	0.0646325		1954.62	38.8224	0.0518238
1955.5	39.3506	0.0646325	39.0213	0.0518238		1955.13	39.2644	0.0646325		1955.62	39.0498	0.0518238
1956.5	39.5708	0.0646325	39.2462	0.0518238		1956.13	39.4913	0.0646325		1956.62	39.2742	0.0518238
1957.5	39.7703	0.0646325	39.4609	0.0518238		1957.13	39.6986	0.0646325		1957.62	39.4872	0.0518238
1958.5	39.9599	0.0646325	39.6636	0.0518238		1958.13	39.8883	0.0646325		1958.62	39.6885	0.0518238
1959.5	40.1628	0.0646325	39.8641	0.0518238		1959.13	40.0833	0.0646325		1959.62	39.8892	0.0518238
1960.5	40.3842	0.0646325	40.0727	0.0518238		1960.13	40.2993	0.0646325		1960.62	40.0991	0.0518238
1961.5	40.6135	0.0646325	40.2905	0.0518238		1961.13	40.527	0.0646325		1961.62	40.318	0.0518238
1962.5	40.8505	0.0646325	40.5163	0.0518238		1962.13	40.7597	0.0646325		1962.62	40.5447	0.0518238
1963.5	41.1042	0.0646325	40.7526	0.0518238		1963.13	41.0057	0.0646325		1963.62	40.7824	0.0518238
1964.5	41.3858	0.0646325	41.0067	0.0518238		1964.13	41.275	0.0646325		1964.62	41.039	0.0518238
1965.5	41.7013	0.0646325	41.2855	0.0518238		1965.13	41.5778	0.0646325		1965.62	41.3211	0.0518238
1966.5	42.0561	0.0646325	41.5952	0.0518238		1966.13	41.9159	0.0646325		1966.62	41.6349	0.0518238
1967.5	42.4616	0.0646325	41.9437	0.0518238		1967.13	42.3009	0.0646325		1967.62	41.9885	0.0518238
1968.5	42.9259	0.0646325	42.3393	0.0518238		1968.13	42.7419	0.0646325		1968.62	42.3902	0.0518238
1969.5	43.4629	0.0646325	42.7924	0.0518238		1969.13	43.2489	0.0646325		1969.62	42.8509	0.0518238
1970.5	44.0791	0.0646325	43.3126	0.0518238		1970.13	43.8363	0.0646325		1970.62	43.3797	0.0518238
1971.5	44.7736	0.0646325	43.9047	0.0518238		1971.13	44.5003	0.0646325		1971.62	43.9809	0.0518238
1972.5	45.5623	0.0646325	44.5762	0.0518238		1972.13	45.2499	0.0646325		1972.62	44.6625	0.0518238
1973.5	46.4657	0.0646325	45.342	0.0518238		1973.13	46.1089	0.0646325		1973.62	45.4409	0.0518238
1974.5	47.4609	0.0646325	46.2064	0.0518238		1974.13	47.0799	0.0646325		1974.62	46.3178	0.0518238
1975.5	48.4664	0.0646325	47.1351	0.0518238		1975.13	48.0937	0.0646325		1975.62	47.2523	0.0518238
1976.5	49.4901	0.0646325	48.1007	0.0518238		1976.13	49.0946	0.0646325		1976.62	48.2222	0.0518238
1977.5	50.6024	0.0646325	49.1217	0.0518238		1977.13	50.1714	0.0646325		1977.62	49.2516	0.0518238
1978.5	51.7717	0.0646325	50.205	0.0518238		1978.13	51.3307	0.0646325		1978.62	50.3422	0.0518238
1979.5	52.9674	0.0646325	51.3352	0.0518238		1979.13	52.5135	0.0646325		1979.62	51.4776	0.0518238
1980.5	54.1914	0.0646325	52.5048	0.0518238		1980.13	53.7318	0.0646325		1980.62	52.6526	0.0518238
1981.5	55.3703	0.0646325	53.684	0.0518238		1981.13	54.9443	0.0646325		1981.62	53.8311	0.0518238
1982.5	56.4629	0.0646325	54.8269	0.0518238		1982.13	56.0624	0.0646325		1982.62	54.9678	0.0518238
1983.5	57.5353	0.0646325	55.933	0.0518238		1983.13	57.1309	0.0646325		1983.62	56.0704	0.0518238
1984.5	58.5954	0.0646325	57.023	0.0518238		1984.13	58.2071	0.0646325		1984.62	57.1592	0.0518238
1985.5	59.5615	0.0646325	58.0792	0.0518238		1985.13	59.2183	0.0646325		1985.62	58.2094	0.0518238
1986.5	60.4732	0.0646325	59.086	0.0518238		1986.13	60.1269	0.0646325		1986.62	59.21	0.0518238
1987.5	61.4383	0.0646325	60.0754	0.0518238		1987.13	61.0654	0.0646325		1987.62	60.1989	0.0518238
1988.5	62.4608	0.0646325	61.0857	0.0518238		1988.13	62.0721	0.0646325		1988.62	61.213	0.0518238
1989.5	63.4984	0.0646325	62.1225	0.0518238		1989.13	63.111	0.0646325		1989.62	62.253	0.0518238
1990.5	64.5126	0.0646325	63.158	0.0518238		1990.13	64.1396	0.0646325		1990.62	63.2871	0.0518238
1991.5	65.4537	0.0646325	64.152	0.0518238		1991.13	65.1172	0.0646325		1991.62	64.2746	0.0518238
1992.5	66.2975	0.0646325	65.0685	0.0518238		1992.13	65.9944	0.0646325		1992.62	65.1799	0.0518238
1993.5	67.0764	0.0646325	65.9045	0.0518238		1993.13	66.791	0.0646325		1993.62	66.0065	0.0518238
1994.5	67.823	0.0646325	66.6881	0.0518238		1994.13	67.5469	0.0646325		1994.62	66.7846	0.0518238
1995.5	68.5472	0.0646325	67.4435	0.0518238		1995.13	68.2791	0.0646325		1995.62	67.5372	0.0518238
1996.5	69.2539	0.0646325	68.1795	0.0518238		1996.13	68.9909	0.0646325		1996.62	68.2708	0.0518238
1997.5	69.9548	0.0646325	68.8974	0.0518238		1997.13	69.692	0.0646325		1997.62	68.9865	0.0518238
1998.5	70.6551	0.0646326	69.6025	0.0518239		1998.13	70.3931	0.0646326		1998.62	69.6903	0.0518239
1999.5	71.3513	0.0646323	70.2983	0.0518236		1999.13	71.0914	0.0646324		1999.62	70.385	0.0518235
2000.5	72.037	0.0646332	70.982	0.0518245		2000.13	71.7822	0.0646327		2000.62	71.067	0.0518249
2001.5	72.7161	0.064628	71.6503	0.0518207		2001.13	72.4607	0.0646312		2001.62	71.733	0.0518191
2002.5	73.4193	0.0646236	72.3172	0.0518279		2002.13	73.1488	0.0646283		2002.62	72.4006	0.0518332
2003.5	74.162	0.064534	73.0105	0.0517469		2003.13	73.8796	0.0645725		2003.62	73.0984	0.0517175
2004.5	74.9008	0.0642116	73.7347	0.0517455		2004.13	74.6303	0.0646225		2004.62	73.8262	0.0518391
2005.5	75.5883	0.055289	74.4669	0.0463236		2005.13	75.34	0.0612819		2005.62	74.5579	0.0453129
2006.5	76.2329	0.031497	75.2126	0.0268716		2006.13	75.9915	0.0395464		2006.62	75.3071	0.0226513
2007.5	76.9231	0.0248964	75.9678	0.0235783		2007.13	76.6578	0.024803		2007.62	76.0619	0.0249966
2008.5	77.6227	0.024842	76.6502	0.0204781		2008.13	77.3744	0.0247228		2008.62	76.7327	0.0201469
2009.5	78.1663	0.0248389	77.3109	0.0202321		2009.13	77.978	0.0247131		2009.62	77.395	0.020326
2010.5	78.7863	0.0248388	77.8811	0.0210324		2010.13	78.5267	0.024713		2010.62	77.9479	0.0209312
2011.5	79.5363	0.0248388	78.5156	0.0199788		2011.13	79.2485	0.024713		2011.62	78.6004	0.0201049
2012.5	80.2694	0.0248388	79.2999	0.0199688		2012.13	80.0009	0.024713		2012.62	79.399	0.020102
2013.5	80.9964	0.0248391	80.0297	0.0199683		2013.13	80.7196	0.024713		2013.62	80.1228	0.020102
2014.5	81.7714	0.0248413	80.7607	0.0199697		2014.13	81.4795	0.0247147		2014.62	80.8467	0.0201038
2015.5	82.5601	0.0253118	81.4432	0.0203154		2015.13	82.258	0.0247522		2015.62	81.535	0.0205001
2016.5	83.3857	0.0270439	82.1726	0.0215329		2016.13	83.0732	0.026036		2016.62	82.2656	0.021097
						2017.13	83.9214	0.0415588

## Sheet: PFC-116
PFC-116
Mid-year						Mid-February				Mid-August
Year	NH	NH error	SH	SH error		Year	NH	NH error		Year	SH	SH error
1900.5	0.002	0.015981	0.002	0.0155054		1900.13	0.002	0.0171834		1900.62	0.002	0.0151921
1901.5	0.002	0.0120907	0.002	0.0124602		1901.13	0.002	0.0134583		1901.62	0.002	0.0120151
1902.5	0.002	0.0103892	0.002	0.0110331		1902.13	0.002	0.010415		1902.62	0.002	0.0109866
1903.5	0.002	0.0105047	0.002	0.0110515		1903.13	0.002	0.0105588		1903.62	0.002	0.0110424
1904.5	0.002	0.010349	0.002	0.010967		1904.13	0.002	0.0103618		1904.62	0.002	0.0109644
1905.5	0.00246457	0.0103624	0.002	0.010982		1905.13	0.00226877	0.0103619		1905.62	0.002	0.0109825
1906.5	0.0029516	0.0103568	0.002	0.0109775		1906.13	0.00277927	0.0103571		1906.62	0.00200417	0.0109773
1907.5	0.00352668	0.010358	0.00255333	0.0109786		1907.13	0.00326848	0.010358		1907.62	0.00264185	0.0109786
1908.5	0.00438973	0.0103576	0.00345117	0.0109783		1908.13	0.00401857	0.0103576		1908.62	0.00357103	0.0109783
1909.5	0.00564068	0.0103577	0.00443696	0.0109784		1909.13	0.00509128	0.0103577		1909.62	0.00455929	0.0109784
1910.5	0.00751696	0.0103576	0.00551974	0.0109783		1910.13	0.00670791	0.0103576		1910.62	0.00565655	0.0109783
1911.5	0.00976784	0.0103576	0.00700912	0.0109783		1911.13	0.00892265	0.0103576		1911.62	0.00721695	0.0109783
1912.5	0.0120283	0.0103576	0.00891964	0.0109783		1912.13	0.0111709	0.0103576		1912.62	0.00916687	0.0109783
1913.5	0.0145034	0.0103576	0.0110234	0.0109783		1913.13	0.0135174	0.0103576		1913.62	0.0112891	0.0109783
1914.5	0.01733	0.0103576	0.0134012	0.0109783		1914.13	0.0162194	0.0103576		1914.62	0.0137141	0.0109783
1915.5	0.0205831	0.0103576	0.0159573	0.0109783		1915.13	0.0192713	0.0103576		1915.62	0.0162671	0.0109783
1916.5	0.0246361	0.0103576	0.0190387	0.0109783		1916.13	0.022963	0.0103576		1916.62	0.0194584	0.0109783
1917.5	0.0294599	0.0103576	0.0229708	0.0109783		1917.13	0.0275815	0.0103576		1917.62	0.0234834	0.0109783
1918.5	0.0344782	0.0103576	0.0274539	0.0109783		1918.13	0.0326184	0.0103576		1918.62	0.0280354	0.0109783
1919.5	0.0391376	0.0103576	0.0320524	0.0109783		1919.13	0.0374901	0.0103576		1919.62	0.0326181	0.0109783
1920.5	0.0430057	0.0103576	0.0365028	0.0109783		1920.13	0.0417182	0.0103576		1920.62	0.0370662	0.0109783
1921.5	0.0456325	0.0103576	0.0403638	0.0109783		1921.13	0.0448404	0.0103576		1921.62	0.0408067	0.0109783
1922.5	0.048182	0.0103576	0.0435402	0.0109783		1922.13	0.0470062	0.0103576		1922.62	0.0439184	0.0109783
1923.5	0.0527146	0.0103576	0.0470098	0.0109783		1923.13	0.0506354	0.0103576		1923.62	0.0474645	0.0109783
1924.5	0.0591134	0.0103576	0.0514455	0.0109783		1924.13	0.0565463	0.0103576		1924.62	0.052034	0.0109783
1925.5	0.0661775	0.0103576	0.0569565	0.0109783		1925.13	0.0634937	0.0103576		1925.62	0.0576795	0.0109783
1926.5	0.0735372	0.0103576	0.0633848	0.0109783		1926.13	0.0707081	0.0103576		1926.62	0.0642167	0.0109783
1927.5	0.0816463	0.0103576	0.0704032	0.0109783		1927.13	0.0784414	0.0103576		1927.62	0.0712889	0.0109783
1928.5	0.0907202	0.0103576	0.0780585	0.0109783		1928.13	0.0871972	0.0103576		1928.62	0.0790402	0.0109783
1929.5	0.100299	0.0103576	0.086604	0.0109783		1929.13	0.0967035	0.0103576		1929.62	0.0877075	0.0109783
1930.5	0.10913	0.0103576	0.0954982	0.0109783		1930.13	0.106103	0.0103576		1930.62	0.0966181	0.0109783
1931.5	0.115434	0.0103576	0.103426	0.0109783		1931.13	0.113573	0.0103576		1931.62	0.104367	0.0109783
1932.5	0.11907	0.0103576	0.109586	0.0109783		1932.13	0.117984	0.0103576		1932.62	0.11029	0.0109783
1933.5	0.122066	0.0103576	0.114472	0.0109783		1933.13	0.120825	0.0103576		1933.62	0.115055	0.0109783
1934.5	0.126559	0.0103576	0.118862	0.0109783		1934.13	0.124498	0.0103576		1934.62	0.119386	0.0109783
1935.5	0.134114	0.0103576	0.123972	0.0109783		1935.13	0.130698	0.0103576		1935.62	0.124648	0.0109783
1936.5	0.145327	0.0103576	0.131398	0.0109783		1936.13	0.140589	0.0103576		1936.62	0.132415	0.0109783
1937.5	0.159612	0.0103576	0.141774	0.0109783		1937.13	0.153856	0.0103576		1937.62	0.143168	0.0109783
1938.5	0.176111	0.0103576	0.154831	0.0109783		1938.13	0.169643	0.0103576		1938.62	0.156538	0.0109783
1939.5	0.194525	0.0103576	0.17021	0.0109783		1939.13	0.187301	0.0103576		1939.62	0.172208	0.0109783
1940.5	0.21539	0.0103576	0.187489	0.0109783		1940.13	0.207063	0.0103576		1940.62	0.189686	0.0109783
1941.5	0.241323	0.0103576	0.20714	0.0109783		1941.13	0.230462	0.0103576		1941.62	0.209667	0.0109783
1942.5	0.275113	0.0103576	0.231438	0.0109783		1942.13	0.261226	0.0103576		1942.62	0.234646	0.0109783
1943.5	0.313609	0.0103576	0.262131	0.0109783		1943.13	0.299259	0.0103576		1943.62	0.26624	0.0109783
1944.5	0.344416	0.0103576	0.295049	0.0109783		1944.13	0.335384	0.0103576		1944.62	0.299185	0.0109783
1945.5	0.358554	0.0103576	0.321462	0.0109783		1945.13	0.35566	0.0103576		1945.62	0.324425	0.0109783
1946.5	0.36424	0.0103576	0.338497	0.0109783		1946.13	0.362071	0.0103576		1946.62	0.340308	0.0109783
1947.5	0.373279	0.0103576	0.351165	0.0109783		1947.13	0.368933	0.0103576		1947.62	0.35269	0.0109783
1948.5	0.387019	0.0103576	0.364092	0.0109783		1948.13	0.381474	0.0103576		1948.62	0.365749	0.0109783
1949.5	0.401716	0.0103576	0.377899	0.0109783		1949.13	0.396324	0.0103576		1949.62	0.379645	0.0109783
1950.5	0.415723	0.0103576	0.391945	0.0109783		1950.13	0.410542	0.0103576		1950.62	0.3937	0.0109783
1951.5	0.429733	0.0103576	0.40598	0.0109783		1951.13	0.424413	0.0103576		1951.62	0.407731	0.0109783
1952.5	0.444012	0.0103576	0.420118	0.0109783		1952.13	0.438662	0.0103576		1952.62	0.421889	0.0109783
1953.5	0.458115	0.0103576	0.434491	0.0109783		1953.13	0.452895	0.0103576		1953.62	0.436305	0.0109783
1954.5	0.471521	0.0103576	0.448489	0.0109783		1954.13	0.466664	0.0103576		1954.62	0.450205	0.0109783
1955.5	0.483589	0.0103576	0.461692	0.0109783		1955.13	0.479325	0.0103576		1955.62	0.463325	0.0109783
1956.5	0.49391	0.0103576	0.474068	0.0109783		1956.13	0.490334	0.0103576		1956.62	0.475589	0.0109783
1957.5	0.502309	0.0103576	0.484968	0.0109783		1957.13	0.499455	0.0103576		1957.62	0.486271	0.0109783
1958.5	0.509347	0.0103576	0.494085	0.0109783		1958.13	0.506807	0.0103576		1958.62	0.495161	0.0109783
1959.5	0.516347	0.0103576	0.502164	0.0109783		1959.13	0.513636	0.0103576		1959.62	0.503155	0.0109783
1960.5	0.523728	0.0103576	0.509976	0.0109783		1960.13	0.520952	0.0103576		1960.62	0.51095	0.0109783
1961.5	0.530921	0.0103576	0.517532	0.0109783		1961.13	0.528287	0.0103576		1961.62	0.518459	0.0109783
1962.5	0.53802	0.0103576	0.524999	0.0109783		1962.13	0.535317	0.0103576		1962.62	0.525941	0.0109783
1963.5	0.545407	0.0103576	0.532439	0.0109783		1963.13	0.542587	0.0103576		1963.62	0.533356	0.0109783
1964.5	0.553383	0.0103576	0.539949	0.0109783		1964.13	0.550254	0.0103576		1964.62	0.540897	0.0109783
1965.5	0.562357	0.0103576	0.547938	0.0109783		1965.13	0.558812	0.0103576		1965.62	0.548946	0.0109783
1966.5	0.572843	0.0103576	0.5569	0.0109783		1966.13	0.568613	0.0103576		1966.62	0.558062	0.0109783
1967.5	0.585399	0.0103576	0.567221	0.0109783		1967.13	0.580339	0.0103576		1967.62	0.568547	0.0109783
1968.5	0.600642	0.0103576	0.579277	0.0109783		1968.13	0.594408	0.0103576		1968.62	0.580836	0.0109783
1969.5	0.620149	0.0103576	0.594173	0.0109783		1969.13	0.611998	0.0103576		1969.62	0.596136	0.0109783
1970.5	0.64556	0.0103576	0.613008	0.0109783		1970.13	0.635014	0.0103576		1970.62	0.615483	0.0109783
1971.5	0.678229	0.0103576	0.636896	0.0109783		1971.13	0.664694	0.0103576		1971.62	0.640045	0.0109783
1972.5	0.720328	0.0103576	0.667369	0.0109783		1972.13	0.702858	0.0103576		1972.62	0.671386	0.0109783
1973.5	0.773737	0.0103576	0.706252	0.0109783		1973.13	0.75194	0.0103576		1973.62	0.711394	0.0109783
1974.5	0.836543	0.0103576	0.75469	0.0109783		1974.13	0.812045	0.0103576		1974.62	0.761078	0.0109783
1975.5	0.901755	0.0103576	0.810523	0.0109783		1975.13	0.877551	0.0103576		1975.62	0.817695	0.0109783
1976.5	0.967077	0.0103576	0.869936	0.0109783		1976.13	0.942173	0.0103576		1976.62	0.877402	0.0109783
1977.5	1.03731	0.0103576	0.932885	0.0109783		1977.13	1.00988	0.0103576		1977.62	0.940895	0.0109783
1978.5	1.11391	0.0103576	1.00103	0.0109783		1978.13	1.08436	0.0103576		1978.62	1.00971	0.0109783
1979.5	1.19584	0.0103576	1.0744	0.0109783		1979.13	1.16433	0.0103576		1979.62	1.08373	0.0109783
1980.5	1.28166	0.0103576	1.15286	0.0109783		1980.13	1.24928	0.0103576		1980.62	1.16285	0.0109783
1981.5	1.36442	0.0103576	1.23408	0.0109783		1981.13	1.33473	0.0103576		1981.62	1.24431	0.0109783
1982.5	1.43809	0.0103576	1.31264	0.0109783		1982.13	1.41177	0.0103576		1982.62	1.32226	0.0109783
1983.5	1.50938	0.0103576	1.38701	0.0109783		1983.13	1.48188	0.0103576		1983.62	1.39614	0.0109783
1984.5	1.58782	0.0103576	1.46275	0.0109783		1984.13	1.55714	0.0103576		1984.62	1.47234	0.0109783
1985.5	1.6705	0.0103576	1.5447	0.0109783		1985.13	1.63953	0.0103576		1985.62	1.55521	0.0109783
1986.5	1.75483	0.0103576	1.63051	0.0109783		1986.13	1.72254	0.0103576		1986.62	1.64126	0.0109783
1987.5	1.84517	0.0103576	1.71752	0.0109783		1987.13	1.81015	0.0103576		1987.62	1.72841	0.0109783
1988.5	1.94151	0.0103576	1.80785	0.0109783		1988.13	1.90482	0.0103576		1988.62	1.81929	0.0109783
1989.5	2.03915	0.0103576	1.90209	0.0109783		1989.13	2.00281	0.0103576		1989.62	1.914	0.0109783
1990.5	2.13413	0.0103576	1.99683	0.0109783		1990.13	2.09916	0.0103576		1990.62	2.00865	0.0109783
1991.5	2.22421	0.0103576	2.08781	0.0109783		1991.13	2.19134	0.0103576		1991.62	2.099	0.0109783
1992.5	2.30962	0.0103576	2.17371	0.0109783		1992.13	2.27809	0.0103576		1992.62	2.18427	0.0109783
1993.5	2.39394	0.0103576	2.25699	0.0109783		1993.13	2.3621	0.0103576		1993.62	2.26735	0.0109783
1994.5	2.48232	0.0103576	2.34046	0.0109783		1994.13	2.44806	0.0103576		1994.62	2.35089	0.0109783
1995.5	2.58041	0.0103576	2.42704	0.0109783		1995.13	2.54169	0.0103576		1995.62	2.43797	0.0109783
1996.5	2.6919	0.0103576	2.52111	0.0109784		1996.13	2.64793	0.0103576		1996.62	2.53314	0.0109784
1997.5	2.81605	0.0103576	2.62594	0.0109783		1997.13	2.76789	0.0103576		1997.62	2.63941	0.0109782
1998.5	2.94776	0.0103575	2.74168	0.0109785		1998.13	2.89783	0.0103576		1998.62	2.75647	0.0109786
1999.5	3.0799	0.0103557	2.86598	0.0109775		1999.13	3.03095	0.0103569		1999.62	2.88179	0.0109771
2000.5	3.2062	0.0103509	2.99395	0.0109799		2000.13	3.1601	0.0103527		2000.62	3.01001	0.0109814
2001.5	3.32629	0.010335	3.11927	0.0109596		2001.13	3.28187	0.01035		2001.62	3.13475	0.0109519
2002.5	3.44445	0.00992805	3.24042	0.0109611		2002.13	3.40025	0.0102499		2002.62	3.25541	0.0109858
2003.5	3.55839	0.00727906	3.36261	0.00961267		2003.13	3.51742	0.00873034		2003.62	3.37793	0.0093466
2004.5	3.65106	0.00418892	3.49141	0.00534851		2004.13	3.62117	0.00458026		2004.62	3.50865	0.00457234
2005.5	3.73551	0.00397996	3.59504	0.00424204		2005.13	3.70153	0.00396863		2005.62	3.60534	0.00427148
2006.5	3.82903	0.00397453	3.68541	0.00423946		2006.13	3.79314	0.00395927		2006.62	3.69815	0.00426605
2007.5	3.92632	0.00397441	3.78568	0.00461906		2007.13	3.89139	0.00395891		2007.62	3.79792	0.00483912
2008.5	4.00639	0.0039744	3.8718	0.00430772		2008.13	3.97879	0.0039589		2008.62	3.88348	0.00427237
2009.5	4.07335	0.0039744	3.9664	0.00428824		2009.13	4.04886	0.0039589		2009.62	3.97784	0.004309
2010.5	4.15317	0.0039744	4.03282	0.0044636		2010.13	4.11954	0.0039589		2010.62	4.04046	0.00444061
2011.5	4.23845	0.0039744	4.11159	0.00423644		2011.13	4.20943	0.0039589		2011.62	4.12314	0.00426609
2012.5	4.30863	0.0039744	4.18612	0.00423463		2012.13	4.28249	0.0039589		2012.62	4.19462	0.00426539
2013.5	4.38539	0.00397448	4.26068	0.00423455		2013.13	4.35561	0.0039589		2013.62	4.27071	0.00426539
2014.5	4.46759	0.00397501	4.34458	0.00423482		2014.13	4.43644	0.00395926		2014.62	4.35546	0.00426578
2015.5	4.54704	0.00405715	4.42814	0.00430636		2015.13	4.5183	0.00396885		2015.62	4.43844	0.00434684
2016.5	4.62532	0.00436651	4.50603	0.00455349		2016.13	4.59404	0.00417325		2016.62	4.5157	0.00446879
						2017.13	4.68153	0.00673568
